# 1 Polygenic Transcriptome Risk Scores 2 Can Translate Genetic Results 3 Between Species

4 **Natasha Santhanam**<sup>1†</sup>, **Sandra Sanchez-Roige**<sup>2,3†</sup>, **Yanyu Liang**<sup>1</sup>,  
5 **Apurva S. Chitre**<sup>3</sup>, **Daniel Munro**<sup>3,5</sup>, **Denghui Chen**<sup>3</sup>, **Riyan Cheng**<sup>3</sup>,  
6 **Festus Nyasimi**<sup>1</sup>, **Margaret Perry**<sup>1</sup>, **Jianjun Gao**<sup>3</sup>, **Anthony M. George**<sup>7</sup>,  
7 **Alex Gileta**<sup>3</sup>, **Katie Holl**<sup>11</sup>, **Alesa Hughson**<sup>10</sup>, **Christopher P. King**<sup>6</sup>,  
8 **Alexander C. Lamparelli**<sup>14</sup>, **Connor D. Martin**<sup>7</sup>, **Angel Garcia**  
9 **Martinez**<sup>9</sup>, **Sabrina Mi**<sup>1</sup>, **Celine L. St. Pierre**<sup>3</sup>, **Jordan Tripi**<sup>6</sup>, **Tengfei**  
10 **Wang**<sup>9</sup>, **Hao Chen**<sup>9</sup>, **Shelly Flagel**<sup>10</sup>, **Keita Ishiwari**<sup>7,8</sup>, **Paul Meyer**<sup>6</sup>,  
11 **Laura Saba**<sup>12</sup>, **Leah C. Solberg Woods**<sup>13</sup>, **Oksana Polesskaya**<sup>3</sup>,  
12 **Abraham A. Palmer**<sup>3,4\*</sup>, **Hae Kyung Im**<sup>1\*</sup>

**\*For correspondence:**

[aap@ucsd.edu](mailto:aap@ucsd.edu) (AAP);  
[haky@uchicago.edu](mailto:haky@uchicago.edu) (HKI)

†These authors  
contributed equally to this  
work

**Present address:**

<sup>§</sup>Department of Psychiatry,  
University of California San  
Diego, La Jolla, CA, USA;  
<sup>¶</sup>Genetic Medicine,  
University of Chicago, US

13 <sup>1</sup>Department of Medicine, Section of Genetic Medicine, The University of  
14 Chicago, Chicago, IL, 60637, USA; <sup>2</sup>Department of Medicine, Division of  
15 Genetic Medicine, Vanderbilt University Medical Center, Nashville, TN,  
16 USA; <sup>3</sup>Department of Psychiatry, University of California San Diego, La  
17 Jolla, CA, 92093, USA; <sup>4</sup>Institute for Genomic Medicine, University of  
18 California San Diego, La Jolla, CA, 92093, USA; <sup>5</sup>Department of Integrative  
19 Structural and Computational Biology, Scripps Research, La Jolla, CA;  
20 <sup>6</sup>University at Buffalo, Department of Psychology, Buffalo, NY, 14260,  
21 USA; <sup>7</sup>University at Buffalo, Clinical and Research Institute on Addictions  
22 University at Buffalo, Buffalo, NY, 14203, USA; <sup>8</sup>University at Buffalo,  
23 Pharmacology and Toxicology University at Buffalo, Buffalo, NY, 14203,  
24 USA; <sup>9</sup>University of Tennessee Health Science Center, Department of  
25 Pharmacology, Addiction Science and Toxicology, Memphis, TN, 38163,  
26 USA; <sup>10</sup>University of Michigan, Department of Psychiatry, Ann Arbor, MI,  
27 48109, USA; <sup>11</sup>Medical College of Wisconsin, Department of Pediatrics,  
28 Milwaukee, WI, 53226, USA; <sup>12</sup>University of Colorado Anschutz Medical  
29 Campus, Department of Pharmaceutical Sciences, Aurora, CO 80045,  
30 USA; <sup>13</sup>Wake Forest University School of Medicine, Department of  
31 Internal Medicine, Winston-Salem, NC, 27157, USA; <sup>14</sup>Department of  
32 psychology, University of California Los Angeles, Los Angeles, CA, 90095,  
33 USA

34

35 **Abstract** Genome-wide association studies have demonstrated that most  
36 traits are highly polygenic; however, translating these polygenic signals into  
37 biological insights remains difficult. A lack of satisfactory methods for  
38 translating polygenic results across species has precluded the use of model  
39 organisms to address this problem. Here we explore the use of polygenic  
40 transcriptomic risk scores (PTRS) for translating polygenic results across species.  
41 Unlike polygenic risk scores (PRS), which rely on SNPs for predicting traits, PTRS  
42 use imputed gene expression for prediction, which allows cross-species  
43 translation to orthologous genes. We first developed RatXcan, which is a  
44 framework for transcriptome-wide association studies (TWAS) in outbred rats.  
45 Leveraging predicted transcriptome and genotype data from UK Biobank, and  
46 the genetically trained gene expression models from RatXcan, we scored more  
47 than 3,000 rats using a human-derived PTRS for height. Strikingly, we found that  
48 human-derived height PTRS significantly predicted body length in rats ( $P < 0.013$ ).  
49 The genes included in the PTRS were enriched for biological pathways including  
50 skeletal growth and metabolism and were over-represented in tissues including  
51 pancreas and brain. This approach facilitates experimental studies in model  
52 organisms that examine the polygenic basis of human complex traits and  
53 provides an empirical metric by which to evaluate the suitability of specific  
54 animal models and identify their shared biological underpinnings.

55

---

## 56 Introduction

57 Over the last decade, genome-wide association studies (GWAS) have identified  
58 numerous genetic loci that contribute to biomedically important traits [*Visscher*  
59 *et al., 2017*]. GWAS have demonstrated that most traits have a highly polygenic  
60 architecture, meaning that numerous genetic variants with individually small ef-  
61 fects confer risk [*Loos, 2020*]. However, translating these results into meaning-  
62 ful biological discoveries remains extremely challenging [*Lewis and Vassos, 2020,*  
63 *Martin et al., 2019, Alliance et al., 2021*].

64 Model organisms provide a system in which the effect of genotype, genetic  
65 manipulations and environmental exposures can be experimentally tested. Whereas  
66 the tools for using model organisms to study *individual* genes are well established,  
67 there are no satisfactory methods for studying the *polygenic* signals obtained  
68 from GWAS in model organisms.

69 The cumulative results from GWAS can be used to construct polygenic risk  
70 scores (PRS), which summarize the effects of many loci on a trait [*Wray et al.,*  
71 *2007*]. However, PRS can not be used to translate to model organisms because  
72 human SNPs do not have direct homologs in other species, and even if they did,  
73 they would not be expected to have the same effects or to tag the same causal  
74 variants.

75 To address this problem, we sought to develop a novel method that allows  
76 translation of polygenic signals from humans to other species and vice-versa.  
77 This method focuses on gene expression, rather than SNPs, and builds on our  
78 past work with polygenic transcriptomic risk scores (PTRS) [*Liang et al., 2022*].  
79 PTRS are premised on the regulatory nature of most GWAS loci [*Maurano et al.,*  
80 *2012*] and use genetically regulated gene expression (transcript abundance), in-  
81 stead of SNPs, as features for prediction. We recently showed that PTRS are use-  
82 ful for translating polygenic signals between different human ancestry groups  
83 [*Liang et al., 2022*], supporting the view that the effects of genes on a phenotype  
84 are conserved across ancestry groups. In the current project, we hypothesized  
85 that the relationships between genes and phenotypes are conserved not only  
86 between human ancestry groups, but also across species. Thus, we explored  
87 whether PTRS trained using human data could predict similar traits in another  
88 species by applying the PTRS to orthologous genes in the target species. We se-  
89 lected heterogeneous stock (HS) rats because they are a well characterized, out-  
90 bred mammalian population for which dense genotype, phenotype and gene ex-  
91 pression data are available in thousands of subjects [*Solberg Woods and Palmer,*  
92 *2019, Chitre et al., 2020, Keele et al., 2018, Crouse et al., 2022*].

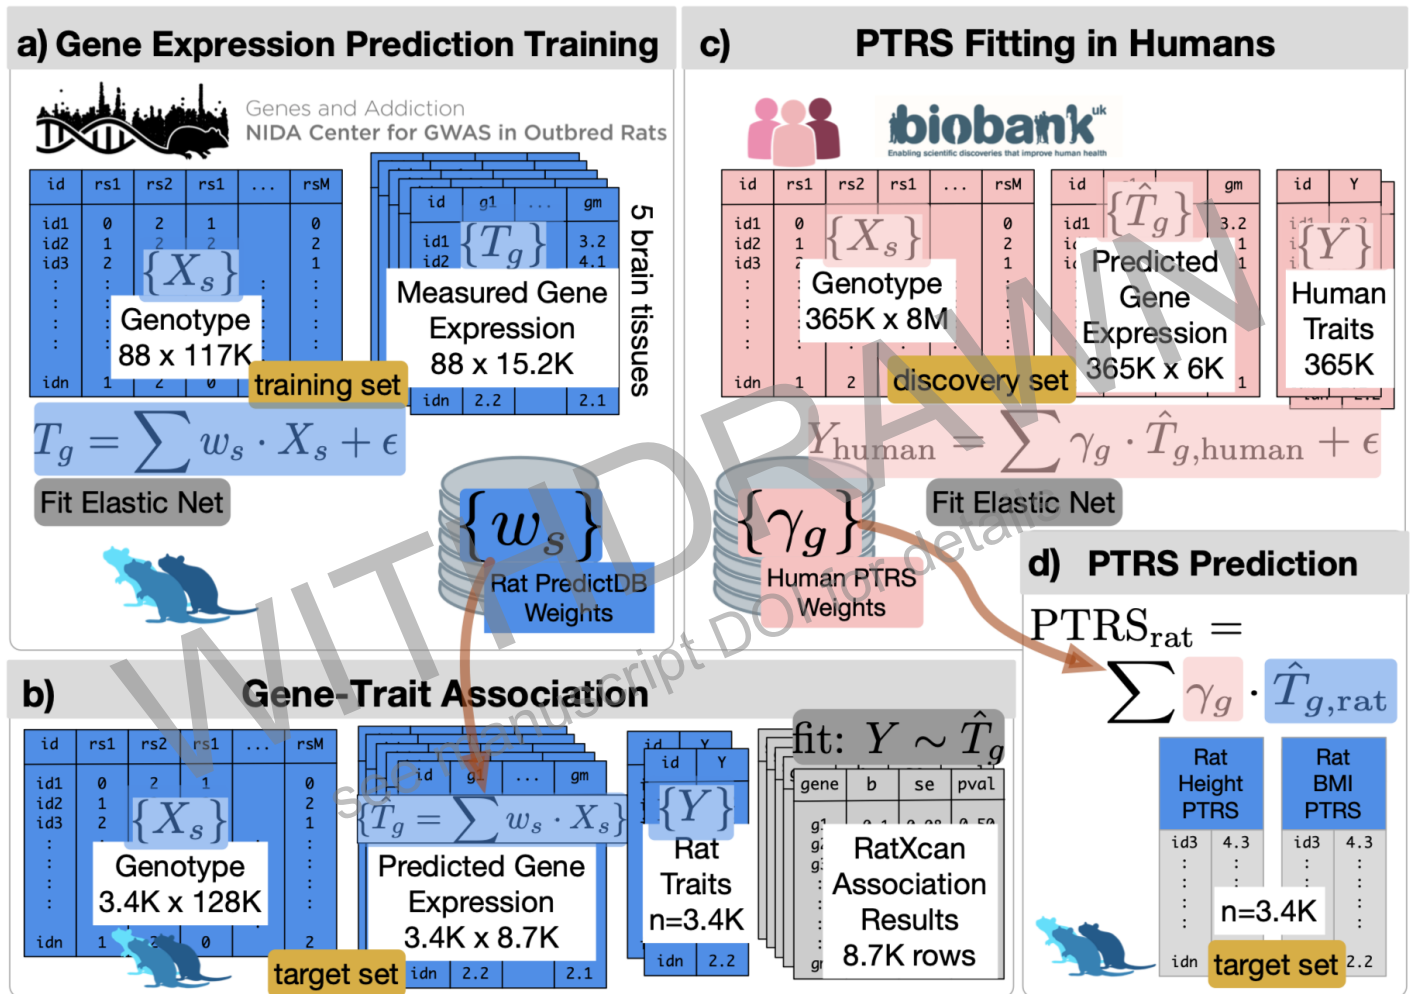

**Figure 1. Schematic representation of cross-species polygenic translation framework.**

The workflow was divided into 4 stages: a) gene expression prediction training, b) gene-trait association, c) PTRS fitting in humans, d) PTRS prediction. a) In the gene expression prediction training stage, we used genotype (117,155 SNPs) and gene expression data (15,216 genes) from samples derived from 5 brain regions in 88 rats. The prediction weights (rat PredictDB weights) are stored in predictdb.org. Rats used in this stage constitute the training set. b) In the gene-trait association stage, we used genotype and phenotype data from the target set of 3,407 rats (no overlap with training set rats). Predicted gene expression (8,567 genes for which prediction was possible) was calculated for all the 3,407 target set rats, and gene-trait associations were tested using RatXcan (N=1,463-3,110). We queried human gene-level associations from PhenomeXcan to estimate enrichment levels with our rat findings. c) Human PTRS weights were fitted using elastic net regression of height on predicted whole blood gene expression levels (7,002 genes) in the UK Biobank (N=356,476). d) The human PTRS weights were used for complex trait prediction in rats. PTRS trained in humans were then used to predict the analogous height trait in our target rat set. Prediction performance of PTRS was calculated as the correlation (and partial correlation) between the predicted scores in rats and the observed traits. Analyses in rats are shown in blue and analyses in humans are shown in pink.

## 93 Results

### 94 Experimental setup

95 To build a framework for translating genetic results between species, we followed  
96 the experimental setup illustrated in Fig. 1. In the *training stage* (Fig. 1a), we inves-  
97 tigated the genetic architecture of gene expression and built prediction models  
98 of gene expression in rats. We used genotype and transcriptome data from five  
99 brain regions sampled from 88 rats, generated by the [NIDA Center for GWAS  
100 for Outbred rats](#) (Fig. 1a). In the *association stage* (Fig. 1b), we used their geno-  
101 type data to predict the transcriptome in a non-overlapping *target set* of 3,407  
102 rats and tested for association between the genetically predicted gene expres-  
103 sion and body length by adapting the PrediXcan software, which was originally  
104 developed for use in humans [[Gamazon et al., 2015](#)], to rats ('RatXcan'). We also  
105 examined fasting glucose, which served as a negative control. In the *discovery*  
106 *stage* (Fig. 1c), we determined the human-derived PTRS weights for height us-  
107 ing data from 356,476 individuals of European descent from UK Biobank. In the  
108 final stage (Fig 1d), we used these human-derived weights in conjunction with  
109 genetically predicted gene expression for rats in the target set. We assessed the  
110 prediction performance by comparing the predictions from the PTRS to the true  
111 body length (which is equivalent to human height) for each rat.

### 112 Genetic Architecture of Gene Expression across Brain Tissues

113 To inform the optimal prediction model training, we examined the genetic archi-  
114 tecture of gene expression in HS rats by quantifying heritability and polygenicity.  
115 Unless otherwise specified, we show the results for nucleus accumbens core in  
116 the main section and the remaining tissues in the supplement.

| Brain Region                  | # Rats | # Genes Predicted | Average $R^2$ | Average cis $h^2$ |
|-------------------------------|--------|-------------------|---------------|-------------------|
| Nucleus Accumbens Core (NAcc) | 78     | 8,567             | 8.51%         | 9.82%             |
| Infralimbic Cortex (IL)       | 83     | 8,856             | 8.87%         | 9.77%             |
| Lateral Habenula (LHb)        | 83     | 8,244             | 7.78%         | 8.86%             |
| Prelimbic Cortex (PL)         | 81     | 8,315             | 9.33%         | 10.12%            |
| Orbitofrontal Cortex (OFC)    | 82     | 8,821             | 9.13%         | 9.82%             |

**Table 1. Summary of heritability and prediction performance in rats.** The table shows the number of rats used in the prediction, number of genes predicted per model, the average prediction performance  $R^2$ , and average cis-heritability cis  $h^2$ , for all gene transcripts.

117 We calculated the heritability of expression for each gene by estimating the  
118 proportion of variance explained (PVE) using a Bayesian Sparse Linear Mixed



119 Model (BSLMM) [Zhou *et al.*, 2013]. We restricted the feature set to variants within  
120 1 Mb of the transcription start site of each gene since this is expected to capture  
121 most cis-eQTLs. Among the 15,216 genes considered, 3,438 genes were herita-  
122 ble (defined as having a 95% credible set lower boundary greater than 1%) in  
123 the nucleus accumbens core. The mean heritability ranged from 8.86% to 10.12%  
124 for all brain tissues tested (Table 1). Fig. 2a shows the heritability estimates for  
125 gene expression in the nucleus accumbens core, while heritability estimates in  
126 other tissues are shown in Fig. S1. In humans, we identified a similar heritability  
127 distribution (Fig. 2b, Fig. S2) based on whole blood samples from GTEx.

128 Next, to evaluate the polygenicity of gene expression levels, we examined  
129 whether predictors with more polygenic (i.e., many variants of small effects) or  
130 more sparse (i.e., just a few larger effect variants) architecture correlated better  
131 with observed expression. We fitted elastic net regression models using a range  
132 of mixing parameters from 0 to 1 (Fig. 2c). The leftmost value of 0 corresponds  
133 to ridge regression, which is fully polygenic and uses all cis-variants. Larger val-  
134 ues of the mixing parameters yield more sparse predictors, with the number of  
135 variants decreasing as the mixing parameter increases. The rightmost value of 1  
136 corresponds to lasso, which yields the most sparse predictor within the elastic net  
137 family. Similar to reports in human data [Wheeler *et al.*, 2016], sparse predictors  
138 outperformed polygenic predictors (Fig. 2c).

139 We used the 10-fold cross-validated Pearson correlation ( $R$ ) between predicted  
140 and observed values as a measure of performance (Spearman correlation yielded  
141 similar results). We observed a substantial drop in performance towards the  
142 more polygenic end of the mixing parameter spectrum (Fig. 2c). For reference,  
143 we show similar results using human gene expression data from whole blood  
144 samples in GTEx individuals (Fig. 2d). Overall, these results indicate that the ge-  
145 netic architecture of gene expression in HS rats (detectable with the currently  
146 available sample size) is sparse, similar to that of humans [Wheeler *et al.*, 2016].

## 147 **Generation of Prediction Models of Gene Expression in Rats**

148 Based on the relative performance across different elastic net mixing parameters,  
149 we chose a value of 0.5, which yielded slightly less sparse predictors than lasso  
150 but provided robustness to missing or low quality variants; this is the same value  
151 that we have chosen in the past for humans datasets [Gamazon *et al.*, 2015].

152 We trained elastic net predictors for all genes in all 5 brain regions. The proce-  
153 dure yielded 8,244-8,856 genes across five brain tissues from the available 15,216  
154 genes (Table 1). The 10-fold cross-validated prediction performance ( $R^2$ ) ranged  
155 from 0 to 80% with a mean of 8.51% in the nucleus accumbens core. As shown in  
156 Fig. 2a and b, mean prediction  $R^2$  was consistently lower than mean heritability,  
157 as is expected since genetic prediction performance is restricted by its heritabil-  
158 ity. Other brain tissues yielded similar prediction performance (Table 1). Reas-

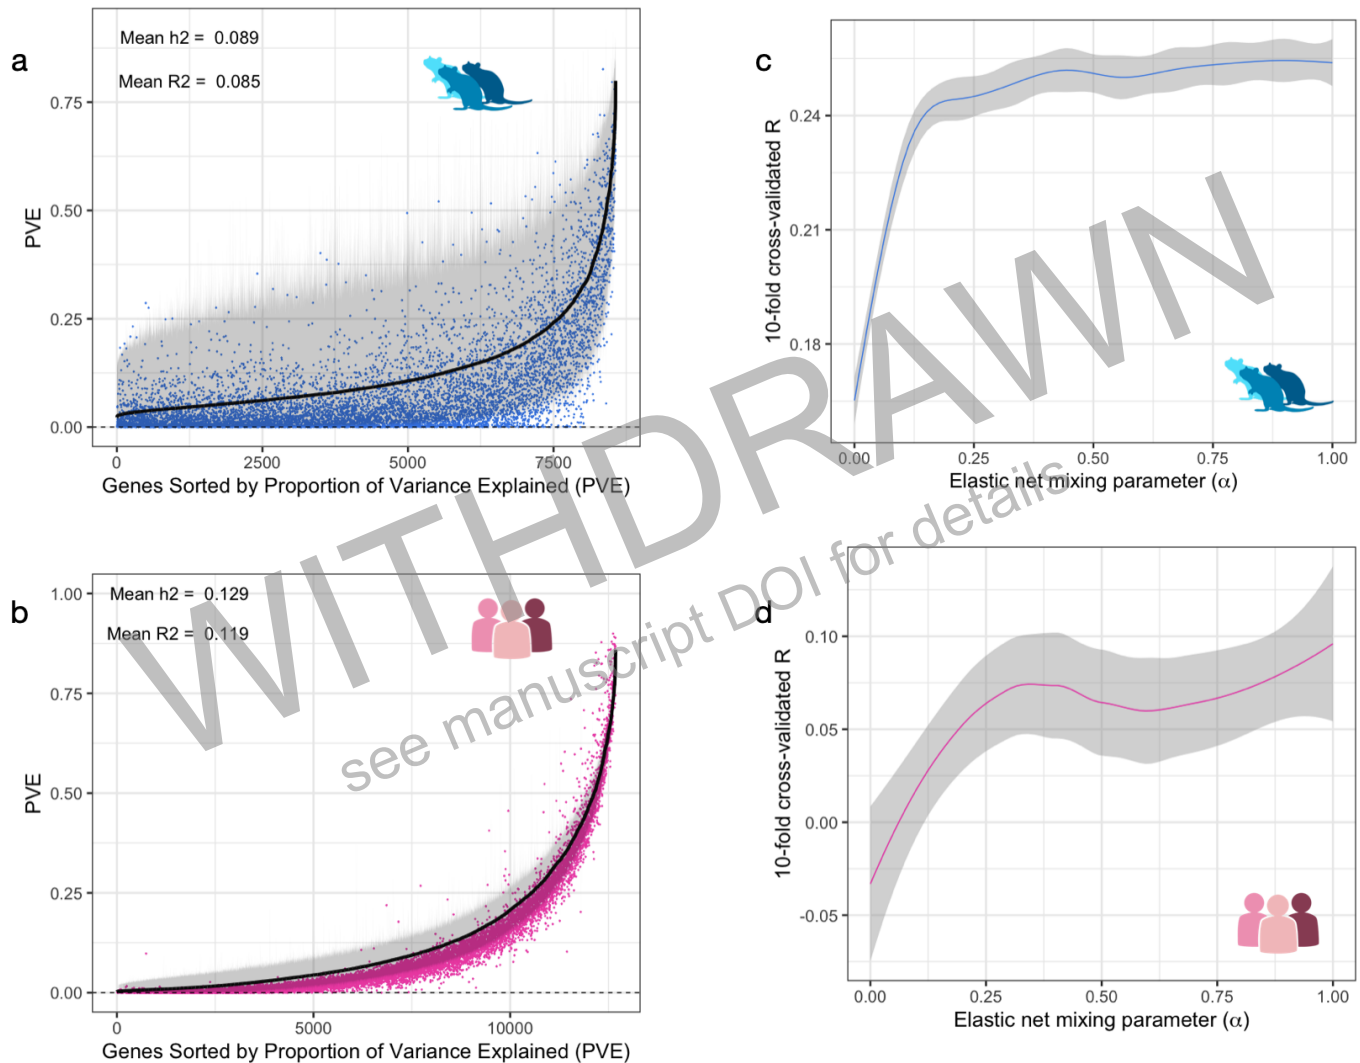

**Figure 2. Heritability and sparsity of gene expression in both rats and humans.** a) cis-heritability of gene expression levels in the nucleus accumbens core of rats calculated using BSLMM (black). We show only genes ( $N = 10,268$ ) that have an equivalent ortholog in the GTEx population. On the x-axis, genes are ordered by their heritability estimates. 95% credible sets are shown in gray for each gene. Blue dots indicate the prediction performance (cross validated  $R^2$  between predicted and observed expression). b) cis heritability of gene expression levels in whole blood tissue in humans from GTEx. We show only the same 10,268 orthologous genes. On the x-axis, genes are ordered by their heritability estimates. 95% credible sets are shown in gray for each gene. Pink dots indicate the prediction performance (cross validated  $R^2$  between predicted and observed expression). c) Cross validated prediction performance in rats (Pearson correlation  $R$ ) as a function of the elastic net parameter ranging from 0 to 1. d) Cross validated prediction performance in humans (Pearson correlation  $R$ ) as a function of the elastic net parameter ranging from 0 to 1.

159 suringly, prediction performance values followed the heritability curve, confirm-  
160 ing that genes with highly heritable expression tend to be better predicted than  
161 genes with low heritability in both HS rats and humans (Fig. 2a-b). Interestingly,  
162 we identified better prediction performance in HS rats than in humans (Fig. S3),  
163 despite heritability of gene expression being similar across species (Fig. 2a-b).

164 In Fig. 3a-b, we show the prediction performance of the best predicted genes  
165 in HS rats (*Mgmt*,  $R^2 = 0.72$ ) and humans (*RPS26*,  $R^2 = 0.74$ ). Across all genes,  
166 we found that the prediction performance in HS rats was correlated with that of  
167 humans ( $R = 0.061$ ,  $P = 8.03 \times 10^{-6}$ ; Fig. 3c). Furthermore, performance per gene  
168 in different tissues was similar in both HS rats (Fig. 3d) and humans (Fig. 3e),  
169 namely, genes that were well-predicted in one tissue were also well-predicted  
170 in another tissue. Correlation of prediction performance across tissues ranged  
171 from 58 to 84% in HS rats and 42 to 69% in humans.

172 Having established the similarity of the genetic architecture of gene expres-  
173 sion between rats and humans, we transitioned to the *association stage*.

#### 174 **PrediXcan/TWAS Implementation in Rats (RatXcan)**

175 To extend the PrediXcan/TWAS framework to rats, we developed RatXcan. We  
176 used the predicted weights from the *training stage* to estimate the genetically reg-  
177 ulated expression in the *target set* of 3,407 densely genotyped HS rats. We then  
178 tested the association between predicted expression and body length.

179 We identified 90 Bonferroni significant genes ( $P(0.05/5388) = 9.28 \times 10^{-6}$ ) in 57  
180 distinct loci separated by  $\pm 1$  Mb for rat body length (Fig. 4a; Supplementary Table  
181 1). Among the 90 significant genes, 30.46% were identified in prior human GWAS  
182 for height. For example, *Tgfa* was associated with body length in rats ( $P = 1.18 \times$   
183  $10^{-9}$ ) and nominally associated in humans [*Comuzzie et al., 2012*] ( $P = 8.00 \times 10^{-6}$ ),  
184 and is related to growth pathways, including epidermal growth factor.

185 To evaluate whether trait-associated genes identified in HS rats were more  
186 significantly associated with the corresponding traits in humans, we performed  
187 enrichment analysis. Specifically, we selected genes that were nominally asso-  
188 ciated with HS rat body length ( $P < 0.05$ ) and compared the p-value from the  
189 analogous human trait (height) against the background distribution. Given the  
190 large sample size of human height GWAS, we expected the background distribu-  
191 tion (shown in pink, Fig. 4b) of height gene-based associated p-values to depart  
192 substantially from the identity line (in gray). The subset of genes that were as-  
193 sociated with rat body length (in blue, Fig. 4b) showed a major departure from  
194 the background distribution, indicating that body length genes in rats were more  
195 significantly associated with human height than expected. To quantify the enrich-  
196 ment, we compared the p-value distribution of all the genes with the distribution  
197 of the subset of genes that were nominally significantly associated with rat body  
198 length ( $P = 6.55 \times 10^{-10}$ ). This systematic enrichment across human and rat find-



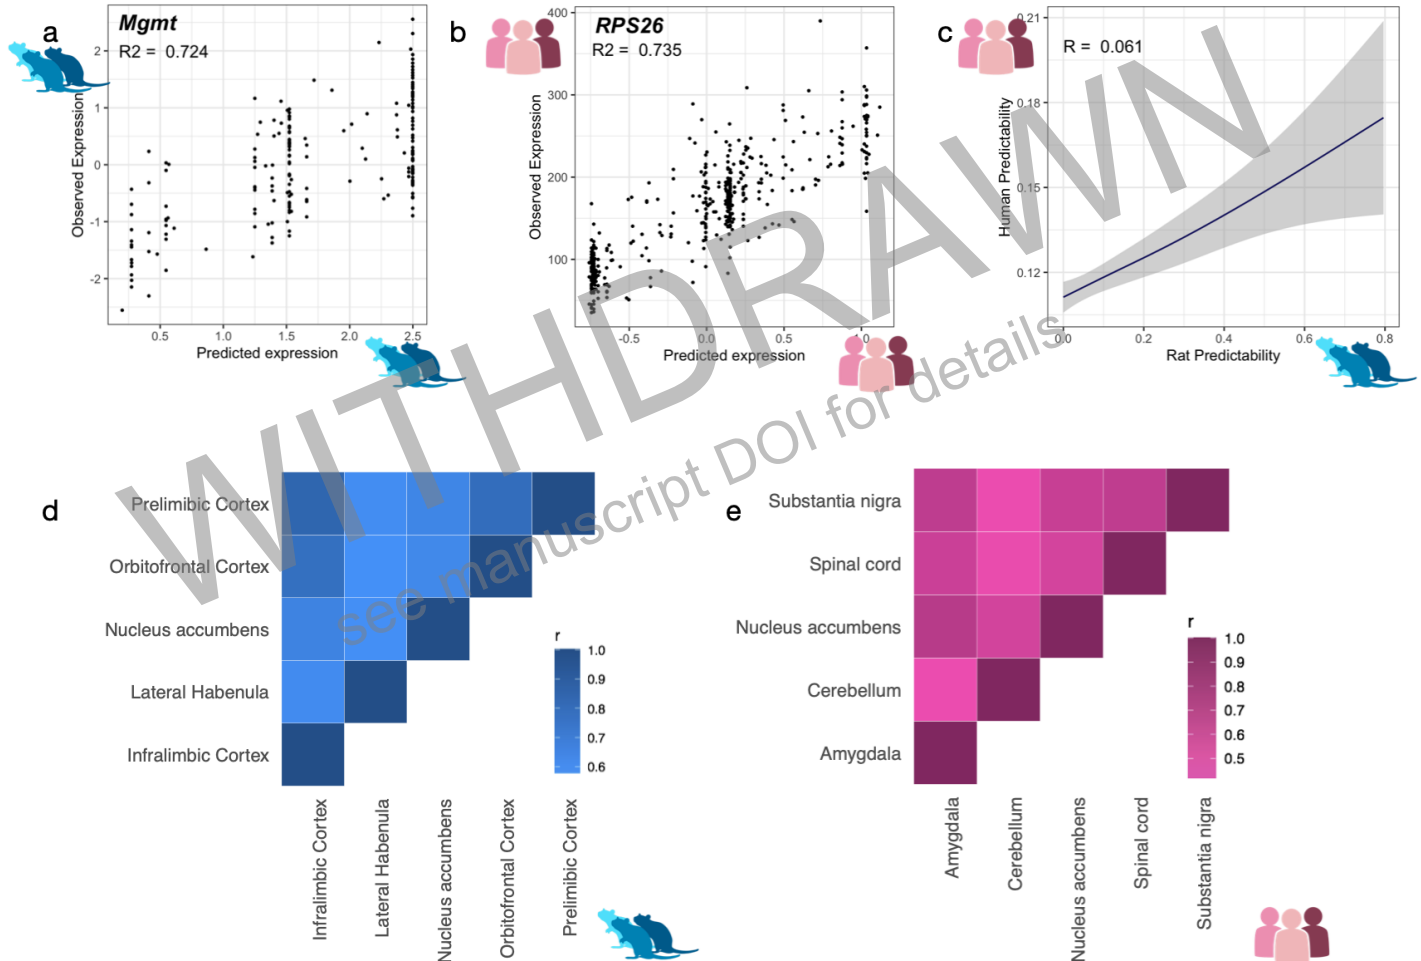

**Figure 3. Shared genetic architecture of gene expression in rats and humans** a) Comparison of predicted vs. observed expression for a well predicted gene in rats (*Mgmt*,  $R^2 = 0.72$ ,  $R = 0.65$ ,  $P < 2.20 \times 10^{-16}$ ). b) In humans, predicted and observed expression for *RPS26* were significantly correlated ( $R^2 = 0.74$ ,  $R = 0.86$ ,  $P < 2.20 \times 10^{-16}$ ). c) Prediction performance was significantly correlated across species ( $R = 0.06$ ,  $P = 8.03 \times 10^{-06}$ ) d-e) and across all five brain tissues tested in rats and humans. In rats, within tissue prediction performance ranged from ( $R = [0.58 - 0.84]$ ,  $P < 2.20 \times 10^{-16}$ ). In humans, the range was [ $R = 0.42 - 0.69$ ,  $P < 2.20 \times 10^{-16}$ ].

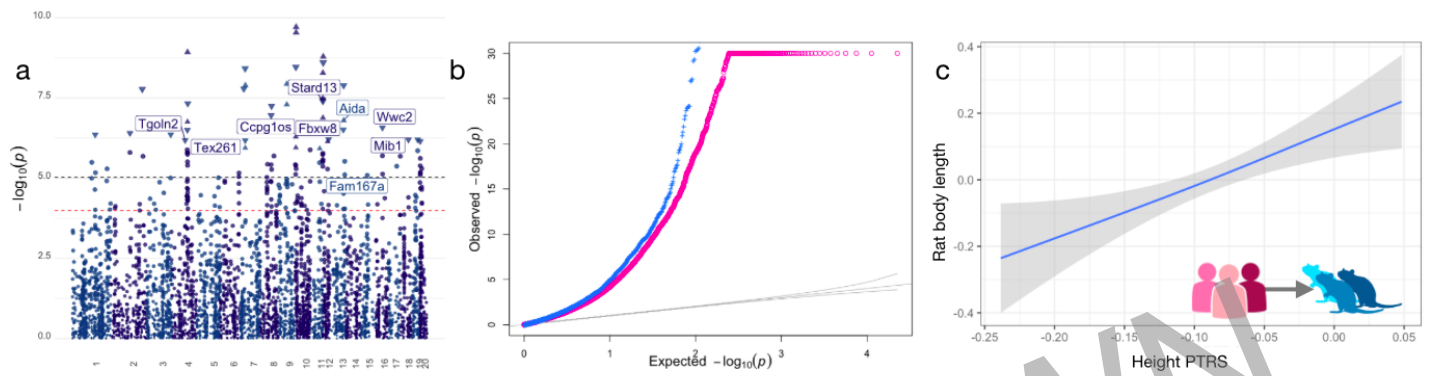

**Figure 4. Polygenic Transcriptomic Risk Scores (PTRS) can translate genetic information across species.** a) Manhattan plot of the association between predicted gene expression and rat body length, which is analogous to human height. We label the genes whose human orthologs are at least nominally associated in human data ( $P < 0.01$ ); Grey dotted line corresponds to the Bonferroni correction threshold of  $0.05/5,388$  of tests. Red dotted line corresponds to an arbitrary threshold of  $1 \times 10^{-4}$ . Triangular points refer to genes that were significantly associated with body length at the Bonferroni threshold, where the direction of the triangle corresponds with the sign of the associated gene. b) Q-Q plot of the p-values of the association between predicted gene expression levels in humans (phenomexcan.org). Pink dots correspond to all genes tested in humans. Blue dots correspond to the subset of genes that were nominally significantly associated with body length in rats ( $P < 0.05$ ). c) Correlation between human-derived height PTRS and observed body length in rats for one of the 37 regularization parameters used in building the PTRS. Correlation coefficients for all 37 models are available in Fig. S5.

199 ings further encouraged us to test whether PTRS based on human studies could  
200 predict the analogous trait in rats.

### 201 **Transfer PTRS from Humans to Rats**

202 To test the portability of PTRS across species, we started by calculating the human  
203 PTRS weights, as described in *Liang et al. [2022]*. Using 356,476 UK Biobank un-  
204 related individuals of European descent, we fitted an elastic net regression with  
205 height as the outcome variable and the imputed gene expression as the predictor  
206 ( $\text{height} = \sum_g \gamma_g \cdot T_g + \epsilon$  with  $\epsilon$ , an error term, and  $T_g$ , the imputed gene expression in  
207 humans). We chose to use GTEx whole blood predictors, as they were previously  
208 reported to perform well in humans [*Liang et al., 2022*]. We applied this proce-  
209 dure for a range of elastic net regularization parameters to increase the flexibility  
210 of the prediction models, resulting in 37 sets of weights. The regularization pa-  
211 rameter is a hyper-parameter that can be estimated in a validation set, which  
212 could be a subset of the target set. Here we show the prediction performance  
213 across the full range of hyper-parameters (37 models).

214 For each rat in the target set, we calculated 37 PTRS (one for each regulariza-  
215 tion parameter) as the weighted sum of the predicted gene expression in rats  
216 with the human-derived weights, which had been previously computed during  
217 the association stage ( $\text{PTRS}_{\text{rat}} = \sum \gamma_g \cdot T_{g,\text{rat}}$ ). We used a range of 1 to 2,017 genes,

218 including only the orthologous genes in rats (28.72%), to discern how prediction  
219 varied as the number of genes changed. The large number of genes used for  
220 prediction is consistent with prior human literature indicating that the genetic  
221 architecture of height is highly polygenic [*Wood et al., 2014*].

222 Consistent with prior human literature [*Yengo et al., 2018, Zhao et al., 2015*],  
223 gene set enrichment analyses showed that the genes used to calculate human  
224 PTRS weights were substantially enriched for pathways and tissues that contribute  
225 to skeletal growth and metabolic processes, including myogenesis ( $P = 1.18 \times$   
226  $10^{-5}$ ), adipogenesis ( $P = 7.74 \times 10^{-17}$ ) and fatty acid metabolism ( $P = 3.97 \times 10^{-15}$ )  
227 (ST. 16). Tissue analysis revealed that PTRS genes are enriched as differentially  
228 expressed genes in multiple relevant tissues, including pancreas, heart, liver, and  
229 central nervous system (Fig. S4).

230 Strikingly, human-derived height PTRS significantly predicted body length in  
231 rats; that is, the correlation between PTRS and observed rat body length was sig-  
232 nificant for all the elastic net regularization parameters that included at least 27  
233 genes (maximum  $R = 0.08$ ,  $P = 8.57 \times 10^{-6}$ ; Fig. 4c and S5). Next, we investi-  
234 gated a possible bias in our analysis due to the fact that genetically similar rats  
235 will tend to have more similar PTRS but also more similar body length inducing a  
236 significant correlation even in the absence of a predictive effect. To rule out this  
237 possibility, we calculated the correlation between some PTRS unrelated to height.  
238 We generated such PTRS by 1) permuting the PTRS weights and 2) flipping their  
239 signs randomly, 1000 times each. Then, we computed empirical p-values as the  
240 proportion of times the absolute value of the (permuted or shuffled) correlation  
241 was larger than the observed correlation. The empirical p-values were less sig-  
242 nificant than our previous estimates, confirming the bias induced by the genetic  
243 similarity between rats. Still, reassuringly the association remained significant  
244 (permutation-based empirical  $P = 0.013$  and random signed based  $P = 0.008$ )  
245 (Fig. S6).

246 As a negative control, we compared the correlation between the human-derived  
247 height PTRS and observed fasting glucose in the target rat set. As shown in Fig.  
248 S7, the correlation was not significant ( $P = 0.71$ ), confirming that the similarity-  
249 induced bias is not as large as to yield a significant correlation in general.

250 To put our prediction performance in context, we used the portability of PTRS  
251 across human populations reported in *Liang et al. [2022]*. For comparability, we  
252 calculated the partial  $R^2$  ( $\tilde{R}^2$ , the proportion of variance explained by the predictor  
253 after accounting for other covariates). The  $\tilde{R}^2$  for body length in rats was 0.64%,  
254 which was only slightly less than half of the 1.46% observed in a non-European  
255 target set in the UK Biobank. The loss of performance when transferring across  
256 species was less pronounced than the loss observed across human populations,  
257 which was as high as 6.5-fold (See supplementary table 6 in *Liang et al. [2022]*).

## 258 Discussion

259 Overwhelming evidence demonstrates that most complex diseases are extremely  
260 polygenic; however, there is an unmet need for methods that translate polygenic  
261 results to other species. Here, we present a novel analytical framework that fa-  
262 cilitates cross-species translation of polygenic results, providing a unique and ur-  
263 gently needed bridge between the human and model organism disciplines. Trans-  
264 lation of polygenic information has been challenging because, despite the utility  
265 of PRS for trait prediction in humans, SNPs are species specific. Our approach  
266 circumvents this limitation by translating polygenic information to the level of  
267 genes and then relying on the mapping of orthologous genes between humans  
268 and another species, in this case rats.

269 A critical first step in this project was the development of RatXcan, which is  
270 the rat version of PrediXcan [*Gamazon et al., 2015*], a well-established statisti-  
271 cal tool that is used in human genetics. We showed that the genetic archite-  
272 cture of gene expression in rats is broadly similar to humans: they are heritable,  
273 sparse, and the degree of heritability is preserved across tissues; some of these  
274 observations are consistent with another recent publication that mapped eQTLs  
275 in HS rats [*Munro et al., 2022*]. Interestingly, despite the smaller sample sizes  
276 used to train our prediction models, rats showed better prediction than humans.  
277 This might reflect the fact that HS rats have a preponderance of common alleles  
278 [*Chitre et al., 2020*] whereas humans have numerous rare alleles that influence  
279 gene expression but are difficult to capture in prediction models. The superior  
280 prediction may also reflect the longer haplotype blocks that are present in HS  
281 rats relative to humans [*Chitre et al., 2020*], which reduces the multiple testing  
282 burden when mapping cis-eQTLs and likely facilitates predictor training.

283 Using RatXcan, we tested gene-level associations of body length, which had  
284 been previously measured in rats. We chose height because of the availability of  
285 large human GWAS that allowed us to develop robust human PTRS for this trait,  
286 relatively large genotyped HS rat cohort in which body length was known, and  
287 relatively unambiguous similarity between humans height and rat body length.  
288 We found substantial enrichment of trait-associated genes among orthologous  
289 human trait-associated genes, which encouraged us to use the human PTRS to  
290 try to predict the similar trait in the HS rats.

291 Remarkably, we found that PTRS developed in humans significantly predicted  
292 rat body length (rat equivalent of height). These results demonstrate that PTRS  
293 is a viable strategy for translating polygenic results between humans and rats.  
294 Even though the proportion of body length variance explained by our PTRS was  
295 only 0.64% compared to the 9.40% in the European target set, that proportion  
296 dropped substantially as low as 1.46% when testing in non European target sets  
297 (See supplementary Table 6 in [*Liang et al., 2022*]).

298 Closer examination of these results revealed that prediction of height improved  
299 until about 100 genes were included in the model. It is likely that larger and thus  
300 more powerful rat transcriptomic datasets would improve prediction by increas-  
301 ing the number of genes that could be used for prediction as well as the accuracy  
302 of prediction. In addition, of the 7,044 genes that were included in the human-  
303 derived PTRS, only 2,017 had rat orthologs (much smaller number than the 10,268  
304 in Figure 2 because not all genes are currently predictable both in humans and  
305 rats); increasing our knowledge of orthologous genes or identifying other strate-  
306 gies to address this limitation will further improve performance.

307 The ability to transfer polygenic signals to other species creates novel oppor-  
308 tunities to explore the mechanisms underlying those traits. For example, genes  
309 included in the human-derived PTRS showed evidence of enrichment in relevant  
310 pathways and tissues for skeletal and metabolic processes, demonstrating that  
311 PTRS can uncover shared underlying biological mechanisms, which can be more  
312 intensively studied in model systems. It is also possible that PTRS could be used  
313 to identify which aspects (e.g. tissues, cell types, etc) of a human trait are recapit-  
314 ulated by analogous phenotypes in model organisms, which could highlight both  
315 the strengths and limitations of phenotypes currently used to model human dis-  
316 eases.

317 Another advantage of our approach is that it focuses on the role of several  
318 genes involved in a phenotype. Thus, PTRS could also serve as a toolkit for identi-  
319 fying components of molecular networks for drug repositioning, namely studies  
320 aimed at identifying small molecules and other interventions that can alter the  
321 global gene expression in model organisms in a way that lowers risk, as predicted  
322 by PTRS analyses.

323 There is a widely recognized need for methods to integrate data from genetics  
324 studies in humans and non-humans [*Palmer et al., 2021b*]. To address this need,  
325 several prior efforts combine human genetic results with sets of genes identified  
326 as differentially expressed in various model organisms [*Reynolds et al., 2021*].  
327 Two such studies examined the overlap between human GWAS results for traits  
328 related to human substance use disorder and changes in gene expression in the  
329 brain, typically following acute or chronic administration of drugs. In two of these  
330 approaches, gene sets were collected from rodent differential gene expression  
331 studies that examined the effects of alcohol and/or nicotine and then used a parti-  
332 tioned heritability approach, which showed enrichment of these genes in human  
333 GWAS results [*Palmer et al., 2021a*], although there was some question about the  
334 specificity of the effects [*Huggett et al., 2021*]. Another study used a broadly sim-  
335 ilar approach but also included protein-protein network information [*Mignogna*  
336 *et al., 2019*]. In yet another study that examined polygenicity in rodents, a cross  
337 was made to introduce genetic variability among mice that all carried the 5XFAD  
338 transgene, which recapitulates some features of Alzheimer's disease (AD). By clas-



339 sifying mice based on their genotype at 19 markers that were near genes impli-  
340 cated by human GWAS for AD, they showed evidence of epistatic modulation of  
341 the phenotypic effects of the 5XFAD allele by these 19 markers [*Neuner et al.,*  
342 *2019*]. While this approach shares the most commonalities with PTRS, Neuner et  
343 al [*Neuner et al., 2019*] did not extrapolate GWAS data to transcript abundance,  
344 did not preserve the weights and directionality available from TWAS and account  
345 for whether or not the mouse genes showed heritable gene expression differ-  
346 ences.

347 Our studies are conceptually similar to studies that seek to examine cellular  
348 and molecular phenotypes in cultured human cells for which PRS have been cal-  
349 culated [*Dobrindt et al., 2020*]. Notably, PTRS captures both the magnitude and  
350 the directionality of each gene's effect on a phenotype. A potential application of  
351 PTRS could be to categorize rodents as being more or less susceptible to human  
352 traits and diseases aimed at quantifying whether non-genetic parameters (e.g.,  
353 drugs, environmental stressors) alter gene expression in a way that modifies the  
354 PTRS, just as pharmacological manipulation can be applied to cells in culture that  
355 have been sorted for PRS or PTRS scores [*So et al., 2017*].

356 There are several limitations in the current study. The sample size of the refer-  
357 ence transcriptome data in rats was limited. We would expect better predictabil-  
358 ity estimates in our elastic-net trained models with larger sample sizes. Further-  
359 more, we used gene expression data from human blood and rat nucleus accum-  
360 bens core because they were convenient datasets, but these tissues are not likely  
361 to be major mediators of height or body length. Second, presumably due to the  
362 lack of adequate sample size, we did not have a sufficiently robust PTRS from rats  
363 to attempt rat to human PTRS translation. Third, we suspect that in both humans  
364 and rats, some gene-level associations may be confounded by linkage disequilib-  
365 rium contamination and co-regulation. This problem is likely to be more serious  
366 in model organisms where even longer range LD exists. Refining PTRS by integrat-  
367 ing fine-mapping and co-localization approaches could improve portability across  
368 species. Fourth, only 2,017 genes could be used for calculating the PTRS. Some  
369 were unavailable because their expression was not well predicted, and others  
370 were unavailable because they lacked one-to-one orthologs. Finally, integration  
371 of other omic data types (e.g., protein, methylation, metabolomics) and the use of  
372 cell-specific data may improve prediction accuracy and cross-species portability.  
373 It is worth noting that while we have shown success with humans and HS rats, it  
374 is still not clear whether more distantly related species, such as non-mammalian  
375 vertebrates or even insects, might also lend themselves to the PTRS approach.

376 Despite these limitations, we have shown that PTRS, which has previously  
377 been used to address the difficulty of transferring PRS between human ancestries  
378 [*Liang et al., 2022*], can successfully transfer polygenic results between species.  
379 One important feature of this approach is its ability to preserve both magnitude

380 and directional information about the relationship between gene expression and  
381 phenotype. This method should support new and transformative experimental  
382 designs. Most importantly, it provides a method to empirically validate traits that  
383 are intended to model or recapitulate aspects of human diseases in model sys-  
384 tems. While the validity of these animal models has been a source of passionate  
385 debate, empirical evidence has been limited. Our polygenic approach provides a  
386 empirical approach to this debate that has been urgently needed.

## 387 Methods

### 388 Genotype and expression data in the training rat set

389 The rats used for this study are part of a large multi-site project focused on ge-  
390 netic analysis of complex traits ([www.ratgenes.org](http://www.ratgenes.org)). N/NIH heterogeneous stock  
391 (HS) outbred rats are the most highly recombinant rat intercross available, and  
392 are a powerful tool for genetic studies ([*Solberg Woods and Palmer, 2019*]; [*Chitre*  
393 *et al., 2020*]). HS rats were created in 1984 by interbreeding eight inbred rat  
394 strains (ACI/N, BN/SsN, BUF/N, F344/N, M520/N, MR/N, WKY/N and WN/N) and  
395 been maintained as an outbred population for almost 100 generations.

396 For training the gene expression predictors, we used RNAseq and genotype  
397 data pre-processed for *Munro et al. [2022]*. We used 88 HS male and female  
398 adult rats, for which whole genome and RNA-sequencing information was avail-  
399 able across five brain tissues [nucleus accumbens core (NAcc), infralimbic cortex  
400 (Il), prelimbic cortex (PL), orbitofrontal cortex (OFC), and lateral habenula (Lhb);  
401 Table 1]. Mean age was  $85.7 \pm 2.2$  for males and  $87.0 \pm 3.8$  for females. All  
402 rats were group housed under standard laboratory conditions and had not been  
403 through any previous experimental protocols. Genotypes were determined us-  
404 ing genotyping-by-sequencing, as described previously in [*Parker et al., 2016*],  
405 [*Chitre et al., 2020*] and [*Gileta et al., 2020*]. Bulk RNA-sequencing was performed  
406 using Illumina HiSeq 4000 with polyA libraries, 100 bp single-end reads, and mean  
407 library size of 27M. Read alignment and gene expression quantification was per-  
408 formed using RSEM and counts were upper-quartile normalized, followed by ad-  
409 ditional quality controlled filtering steps as described in *Munro et al. [2022]*. Gene  
410 expression levels refer to transcript abundance for reads aligned to the gene's ex-  
411 ons using the Ensembl Rat Transcriptome.

412 For each gene, we inverse normalized the TPM values to account for outliers  
413 and fit a normal distribution. We then performed PEER factor analysis [*Stegle*  
414 *et al., 2010*]. We regressed out sex, batch number, batch center and 7 PEER fac-  
415 tors from the gene expression and saved the residuals for all downstream analy-  
416 ses.

## 417 **Genotype and phenotype data in the target rat set**

418 We used genotype and phenotype data from 3,407 HS rats (i.e., target set) re-  
419 ported in *Chitre et al.* [2020]. We used phenotypic information on body length  
420 (including tail), and fasting glucose. For each trait, sex, age, batch number and  
421 site, were regressed out if they were significant and if they explained more than  
422 2 % of the variance, as described in [*Chitre et al.*, 2020].

## 423 **Querying human gene-trait association results**

424 To retrieve analogous human gene-trait association results, we queried PhenomeX-  
425 can, a web-based tool that serves gene-level association results for 4,091 traits  
426 based on predicted expression in 49 GTEx tissues [*Pividori et al.*, 2020]. Ortholo-  
427 gous genes (N = 22,777) were mapped with Ensembl annotation, using the *biomart*  
428 R package and were one to one matched.

## 429 **Estimating gene expression heritability**

430 We calculated the cis-heritability of gene expression from the training set using a  
431 Bayesian sparse linear mixed model, BSLMM [*Zhou et al.*, 2013], as implemented  
432 in GEMMA. We used variants within the  $\pm 1$ Mb window up- and down-stream of  
433 the transcription start and end of each gene annotated by Gencode v26 [*Frankish*  
434 *et al.*, 2021]. We used the proportion of variance explained (PVE) generated by  
435 GEMMA as the measure of cis-heritability of gene expression. We then display  
436 only the PVE estimates of 10,268 genes that were also present in the human gene  
437 expression data.

438 Heritability of human gene expression, which was also calculated with BSLMM,  
439 was downloaded from the database generated by *Wheeler et al.* [2016]. Genes  
440 were also limited to the same 10,268 as above.

## 441 **Examining polygenicity versus sparsity of gene expression**

442 To examine the polygenicity versus sparsity of gene expression in rats, we iden-  
443 tified the optimal elastic net mixing parameter  $\alpha$ , as described in *Wheeler et al.*  
444 [2016]. Briefly, we compared the prediction performance of a range of elastic net  
445 mixing parameters spanning from 0 to 1 (11 values from 0 to 1, with steps of 0.1).  
446 If the optimal mixing parameter was closer to 0, corresponding to ridge regres-  
447 sion, we deemed gene expression trait to be polygenic. In contrast, if the optimal  
448 mixing parameter was closer to 1, corresponding to lasso, then the gene expres-  
449 sion trait was considered to be more sparse. We also restricted the number of  
450 genes in the pipeline to the 10,268 orthologous genes.

## 451 **Training gene expression prediction in rats**

452 To train prediction models for gene expression in rats, we used the training set  
453 of 88 rats described above and followed the elastic net pipeline from [predictdb.org](https://predictdb.org).

454 Briefly, for each gene, we fitted an elastic net regression using the *glmnet* package  
455 in R. We only included variants in the cis region (i.e., 1Mb up and downstream of  
456 the transcription start and end). The regression coefficient from the best penalty  
457 parameter (chosen via *glmnet*'s internal 10-fold cross validation [*Zou and Hastie,*  
458 *2005*]) served as the weight for each gene. The calculated weights ( $w_s$ ) are avail-  
459 able in [predictdb.org](https://predictdb.org). For the comparison of number of predictable genes across  
460 species, we ran the same cross-validated elastic net pipeline in four GTEx tissues  
461 with sample sizes similar to that of the rats: Substantia Nigra, Kidney Cortex,  
462 Uterus and Ovary. To ensure fair comparison, we used the same number of  
463 genes that were orthologous across all four human tissues and rat tissues.

### 464 **Estimating overlap and enrichment of genes between rats and hu-** 465 **mans**

466 For human transcriptome prediction used in the comparison with rats, we simply  
467 downloaded elastic net predictors trained in GTEx whole blood samples from  
468 the PredictDB portal, as previously done in humans [*Barbeira et al., 2021*]. This  
469 model was different from the ones used in the UK Biobank for calculating the  
470 PTRS weights (See Calculating PTRS in a rat target set).

471 We quantified the accuracy of the prediction models using a 10-fold cross val-  
472 idated correlation ( $R$ ) and correlation squared ( $R^2$ ) between predicted and ob-  
473 served gene expression [*Zou and Hastie, 2005*]. For the rat prediction models,  
474 we only included genes whose prediction performance was greater than 0.01 and  
475 had a non-negative correlation coefficient, as these genes were considered well  
476 predicted.

477 We tested the prediction performance of our elastic net model trained in nu-  
478 cleus accumbens core in an independent rat reference transcriptome set. We  
479 predicted expression in the reference set of 188 individuals and compared to  
480 observed genetic expression in the nucleus accumbens core.

### 481 **Implementing RatXcan**

482 We developed RatXcan, based on PrediXcan [*Gamazon et al., 2015*] [*Barbeira*  
483 *et al., 2018*] in humans. RatXcan uses the elastic net prediction models generated  
484 in the training set. In the prediction stage, we generated a predicted expression  
485 matrix for all genes in the rat target set, by fitting an additive genetic model:

$$486 \quad Y_g = \sum_k w_{k,g} X_k + \epsilon$$

487  $Y_g$  is the predicted expression of gene  $g$ ,  $w_{k,g}$  is the effect size of marker  $k$  for  
488 gene  $g$ ,  $X_k$  is the number of reference alleles of marker  $k$  and  $\epsilon$  is the contribution  
489 of other factors that determine the predicted gene expression, assumed to be  
490 independent of the genetic component.

491 We then tested the association between the predicted expression matrix and  
492 body length. We fitted a linear regression of the phenotype on the predicted

493 expression of each gene, which generated gene-level association results for all  
494 gene trait pairs.

### 495 **Estimating overlap and enrichment of genes between rats and hu-** 496 **mans**

497 We queried PhenomeXcan to identify genes associated with human height. Phe-  
498 nomeXcan provides gene level associations aggregated across all available GTEx  
499 tissues, as calculated by MultiXcan (and extension of PrediXcan) [*Barbeira et al.,*  
500 *2019*]. To this aim, we adapted MultiXcan to similarly aggregate our results across  
501 the 5 tested brain tissues in rats. We used a Q-Q plot to inspect the level of enrich-  
502 ment across rat and human findings. To quantify enrichment, we used a Mann-  
503 Whitney test as implemented in R to discern whether the distribution of the p-  
504 values for genes in humans was the same for the genes that were and were not  
505 nominally significant in rats.

### 506 **Calculating PTRS weights in the UK Biobank**

We calculated human-derived height PTRS weights using elastic net with a mixing parameter of 0.5, as described in *Liang et al. [2022]*. We predicted expression levels in 356,476 UK Biobank unrelated participants of European descent using whole blood prediction models trained in GTEx. We used the prediction models trained with UTMOST based on grouped lasso, which borrows information across tissues to improve prediction performance [*Barbeira et al., 2020, Hu et al., 2019*]. The predicted expression was generated using high quality SNPs from Hapmap2 [*McCarthy et al., 2016*]. We performed elastic net regression with height as the predicted variable and the predicted expression matrix from 356,476 UK Biobank unrelated individuals of European descent. More specifically, for each regularization parameter  $\lambda$ , we selected weight parameters  $\gamma_g$  that minimized the mean squared difference between the predicted variable  $Y$  and prediction model  $X\gamma + \gamma_0$  where  $\hat{T}_g \in \mathbb{R}^{N \times 1}$  is the standardized predicted expression level of gene  $g$  across  $N$  individuals and  $\hat{C}_l \in \mathbb{R}^{N \times 1}$  is the the observed value of the  $l$ th standardized covariate:

$$\gamma^{EN} = \underset{\gamma}{\operatorname{argmin}} \overbrace{\frac{1}{N} \|Y - X\gamma - \gamma_0\|_2^2}^{\text{loss:ly}} + \lambda\alpha \|\gamma\|_1 + \lambda_a(1 - \alpha)(\|\gamma\|_2)^2$$

$$X := [\hat{T}_1, \dots, \hat{T}_m, C_1, \dots, C_L]$$

507 where  $\gamma_0$  is the intercept,  $m$  the number of genes,  $L$  is the number of covariates,  
508  $\|B\|_2^2$  is the  $l_2$  norm and the  $\|B\|_1$  is the  $l_1$  norm of the effect size vector.  $\alpha$  de-  
509 notes the elastic net mixing parameter and  $\lambda$  is the regularization parameter. 37  
510 different  $\lambda$ 's were used, generating 37 different sets of predictors. Covariates in-  
511 cluded age at recruitment (Data-Field 21022), sex (Data-Field 31), and the first 20



512 genetic PCs. For more details, see *Liang et al. [2022]*. The values of the regulariza-  
513 tion parameters were chosen in a region likely to cover a wide range of sparsity  
514 in the resulting models, from very sparse, containing a couple of genes, to dense,  
515 containing all genes *Liang et al. [2022]*.

### 516 **Calculating PTRS in a rat target set**

517 To calculate human-derived height PTRS for body length in the target rats, we  
518 used the predicted gene expression matrix calculated for the association stage.  
519 For each rat, we multiplied the predicted expression with the corresponding human-  
520 derived weight for that gene. The aggregated effects of these weighted genes are  
521 summarized in a single score, PTRS:

$$522 \text{PTRS}(\text{rat}) = \sum \gamma_g \cdot \hat{T}_g(\text{rat})$$

523 We generated 37 PTRS models for height for a range of regularization param-  
524 eters (Fig. S5). To identify biologically relevant tissues, pathways and gene sets  
525 associated with the genes included in the PTRS, we applied multiple complemen-  
526 tary analyses using FUMA v1.3.8 [*Watanabe et al., 2017*]. These included tissue  
527 enrichment using differentially expressed genes across 54 specific tissue types  
528 from GTEx V8. We included multiple gene sets (KEGG, Reactome, GO and Hall-  
529 mark) from the Molecular Signature Database (MsigDB) v7.0.

### 530 **Quantifying PTRS prediction performance**

531 We calculated the Pearson correlation ( $R$ ) coefficient between height PTRS the  
532 and analogous observed phenotype in rats. To facilitate comparison with pre-  
533 vious papers, we report partial  $\tilde{R}^2$ . In rats, body length had already been  
534 adjusted for covariates,  $\tilde{R}^2$  is equivalent to  $R^2$ . We verified that using Spearman  
535 correlation did not change the substance of the results (data not shown).

### 536 **Permutation-based p-values of the correlation between PTRS and ob- 537 served traits**

538 To rule out the possibility that the correlation between PTRS and the observed  
539 traits were driven by the similarity between predicted expression among more  
540 similar rats, we performed two types of simulations. In one, we permuted the  
541 weights corresponding to genes in the PTRS and computed the correlation be-  
542 tween the PTRS based on permuted weights and the observed trait. We repeated  
543 this simulation 1000 times. For each simulation, we used the same permutation  
544 for all the 37 prediction models so that PTRS based on similar hyperparameters  
545 would be correlated. In the next simulation, we randomly flipped the sign of the  
546 weights. The empirical p-value was calculated as the proportion of times the ob-  
547 served correlation was larger than the simulated correlation. We used absolute  
548 values to obtain two-sided empirical p-values.

## 549 **Code and Data Availability**

550 The code used for this work is available at [https://github.com/hakyimlab/Rat\\_Genomics\\_Paper\\_Pipeline](https://github.com/hakyimlab/Rat_Genomics_Paper_Pipeline). Genotype and expression data are available through [Munro *et al.*,  
551 **2022**]. Prediction models for gene expression in all five brain tissues in rats are  
552 available at [predictdb.org](https://predictdb.org)  
553

## 554 **Acknowledgments**

555 This research has been conducted using the UK Biobank Resource under Appli-  
556 cation Number 19526. We thank Natalia Gonzales and Christian Jones for help  
557 editing the paper. This work was partially supported by DP1DA054394 (SSR),  
558 P30DK020595 and R01CA242929 (HKI, NS, MP), P30DA044223 and R24 AA013162  
559 (LS)

## 560 **Author contributions**

561 A.A.P. and H.K.I. conceived the cross species PTRS and supervised the work. N.S.  
562 and Y.L. performed a large portion of the analyses. N.S. and S.S-R. analyzed and  
563 interpreted the results and wrote the initial draft of the manuscript. MP and FN  
564 performed analysis of some of the PTRS results. S.M., D.M., A.C., D.C., L.S-W, and  
565 O.P. pre-processed and analyzed the RNAseq, genotype, and phenotype data.  
566 R.C., J.G., A.M.G., A.G., K.H., A.H., C.P.K., C.L.S-P., J.T., T.W., H.C., S.F., K.I., P.M., L.S.  
567 were involved in various aspects of the collection of the rat physiological traits.  
568 All authors read, edited and approved the final version of the manuscript.

## 569 **Competing interests**

570 The authors declare no conflict of interest.

## 571 **Ethics declaration**

572 Not applicable.

## 573 **References**

- 574 **Alliance ICD**, Adeyemo A, Balaconis MK, Darnes DR, Ripatti S, Widen E, Zhou A. Responsi-  
575 ble use of polygenic risk scores in the clinic: potential benefits, risks and gaps. *Nature*  
576 *Medicine*. 2021; 27(11):1876–1884.
- 577 **Barbeira AN**, Bonazzola R, Gamazon ER, Liang Y, Park Y, Kim-Hellmuth S, Wang G, Jiang  
578 Z, Zhou D, Hormozdiari F, et al. Exploiting the GTEx resources to decipher the mecha-  
579 nisms at GWAS loci. *Genome biology*. 2021; 22(1):1–24.
- 580 **Barbeira AN**, Dickinson SP, Bonazzola R, Zheng J, Wheeler HE, Torres JM, Torstenson ES,  
581 Shah KP, Garcia T, Edwards TL, et al. Exploring the phenotypic consequences of tissue

- 582 specific gene expression variation inferred from GWAS summary statistics. *Nature*  
583 *communications*. 2018; 9(1):1–20.
- 584 **Barbeira AN**, Melia OJ, Liang Y, Bonazzola R, Wang G, Wheeler HE, Aguet F, Ardlie KG, Wen  
585 X, Im HK. Fine-mapping and QTL tissue-sharing information improves the reliability of  
586 causal gene identification. *Genet Epidemiol*. 2020 Sep; n/a(n/a).
- 587 **Barbeira AN**, Pividori M, Zheng J, Wheeler HE, Nicolae DL, Im HK. Integrating predicted  
588 transcriptome from multiple tissues improves association detection. *PLoS genetics*.  
589 2019; 15(1):e1007889.
- 590 **Chitre AS**, Polesskaya O, Holl K, Gao J, Cheng R, Bimschleger H, Garcia Martinez A, George  
591 T, Gileta AF, Han W, et al. Genome-Wide Association Study in 3,173 Outbred Rats Identifies  
592 Multiple Loci for Body Weight, Adiposity, and Fasting Glucose. *Obesity*. 2020;  
593 28(10):1964–1973.
- 594 **Comuzzie AG**, Cole SA, Laston SL, Voruganti VS, Haack K, Gibbs RA, Butte NF. Novel  
595 genetic loci identified for the pathophysiology of childhood obesity in the Hispanic  
596 population. *PloS one*. 2012; 7(12):e51954.
- 597 **Crouse WL**, Das SK, Le T, Keele G, Holl K, Seshie O, Craddock AL, Sharma NK, Comeau  
598 ME, Langefeld CD, Hawkins GA, Mott R, Valdar W, Solberg Woods LC. Transcriptome-  
599 wide analyses of adipose tissue in outbred rats reveal genetic regulatory mechanisms  
600 relevant for human obesity. *Physiological Genomics*. 2022 Jun; 54(6):206–219. doi:  
601 [10.1152/physiolgenomics.00172.2021](https://doi.org/10.1152/physiolgenomics.00172.2021).
- 602 **Dobrindt K**, Zhang H, Das D, Abdollahi S, Prorok T, Ghosh S, Weintraub S, Genovese  
603 G, Powell SK, Lund A, et al. Publicly available hiPSC lines with extreme polygenic risk  
604 scores for modeling schizophrenia. *Complex psychiatry*. 2020; 6(3-4):68–82.
- 605 **Frankish A**, Diekhans M, Jungreis I, Lagarde J, Loveland JE, Mudge JM, Sisu C, Wright JC,  
606 Armstrong J, Barnes I, et al. GENCODE 2021. *Nucleic acids research*. 2021; 49(D1):D916–  
607 D923.
- 608 **Gamazon ER**, Wheeler HE, Shah KP, Mozaffari SV, Aquino-Michaels K, Carroll RJ, Eyer AE,  
609 Denny JC, Nicolae DL, Cox NJ, et al. A gene-based association method for mapping  
610 traits using reference transcriptome data. *Nature genetics*. 2015; 47(9):1091–1098.
- 611 **Gileta AF**, Gao J, Chitre AS, Bimschleger HV, St Pierre CL, Gopalakrishnan S, Palmer AA.  
612 Adapting genotyping-by-sequencing and variant calling for heterogeneous stock rats.  
613 *G3: Genes, Genomes, Genetics*. 2020; 10(7):2195–2205.
- 614 **Hu Y**, Li M, Lu Q, Weng H, Wang J, Zekavat SM, Yu Z, Li B, Gu J, Muchnik S, et al. A statistical  
615 framework for cross-tissue transcriptome-wide association analysis. *Nature genetics*.  
616 2019; 51(3):568–576.
- 617 **Huggett SB**, Johnson EC, Hatoum AS, Lai D, Srijevantham J, Bubier JA, Chesler EJ, Agrawal  
618 A, Palmer AA, Edenberg HJ, et al. Genes identified in rodent studies of alcohol intake  
619 are enriched for heritability of human substance use. *Alcoholism: Clinical and Experimental Research*. 2021; .  
620

- 621 **Keele GR**, Prokop JW, He H, Holl K, Littrell J, Deal A, Francic S, Cui L, Gatti DM, Broman KW,  
622 Tschannen M, Tsaih SW, Zagloul M, Kim Y, Baur B, Fox J, Robinson M, Levy S, Flister MJ,  
623 Mott R, et al. Genetic Fine-Mapping and Identification of Candidate Genes and Variants  
624 for Adiposity Traits in Outbred Rats. *Obesity* (Silver Spring, Md). 2018 Jan; 26(1):213–  
625 222. doi: [10.1002/oby.22075](https://doi.org/10.1002/oby.22075).
- 626 **Lewis CM**, Vassos E. Polygenic risk scores: from research tools to clinical instruments.  
627 *Genome medicine*. 2020; 12(1):1–11.
- 628 **Liang Y**, Pividori M, Manichaikul A, Palmer AA, Cox NJ, Wheeler HE, Im HK. Polygenic  
629 transcriptome risk scores (PTRS) can improve portability of polygenic risk scores across  
630 ancestries. *Genome Biol*. 2022 Jan; 23(1):23.
- 631 **Loos RJ**. 15 years of genome-wide association studies and no signs of slowing down.  
632 *Nature Communications*. 2020; 11(1):1–3.
- 633 **Martin AR**, Kanai M, Kamatani Y, Okada Y, Neale BM, Daly MJ. Clinical use of current poly-  
634 genic risk scores may exacerbate health disparities. *Nature genetics*. 2019; 51(4):584.
- 635 **Maurano MT**, Humbert R, Rynes E, Thurman RE, Haugen E, Wang H, Reynolds AP, Sand-  
636 strom R, Qu H, Brody J, et al. Systematic localization of common disease-associated  
637 variation in regulatory DNA. *Science*. 2012; 337(6099):1190–1195.
- 638 **McCarthy S**, Das S, Kretzschmar W, Delaneau O, Wood AR, Teumer A, Kang HM, Fuchs-  
639 berger C, Danecek P, Sharp K, et al. A reference panel of 64,976 haplotypes for geno-  
640 type imputation. *Nature genetics*. 2016; 48(10):1279.
- 641 **Mignogna KM**, Bacanu SA, Riley BP, Wolen AR, Miles MF. Cross-species alcohol  
642 dependence-associated gene networks: co-analysis of mouse brain gene expression  
643 and human genome-wide association data. *PloS one*. 2019; 14(4):e0202063.
- 644 **Munro D**, , Palmer A, Mohammadi P. The regulatory landscape of multiple brain regions  
645 in outbred heterogeneous stock rats. . 2022; .
- 646 **Neuner SM**, Heuer SE, Huentelman MJ, O'Connell KM, Kaczorowski CC. Harnessing ge-  
647 netic complexity to enhance translatability of Alzheimer's disease mouse models: a  
648 path toward precision medicine. *Neuron*. 2019; 101(3):399–411.
- 649 **Palmer RH**, Benca-Bachman CE, Huggett SB, Bubier JA, McGearry JE, Ramgiri N, Srijevan-  
650 than J, Yang J, Visscher PM, Yang J, et al. Multi-omic and multi-species meta-analyses  
651 of nicotine consumption. *Translational psychiatry*. 2021; 11(1):1–10.
- 652 **Palmer RH**, Johnson EC, Won H, Polimanti R, Kapoor M, Chitre A, Bogue MA, Benca-  
653 Bachman CE, Parker CC, Verma A, et al. Integration of evidence across human  
654 and model organism studies: A meeting report. *Genes, Brain and Behavior*. 2021;  
655 20(6):e12738.
- 656 **Parker CC**, Gopalakrishnan S, Carbonetto P, Gonzales NM, Leung E, Park YJ, Aryee E, Davis  
657 J, Blizard DA, Ackert-Bicknell CL, et al. Genome-wide association study of behavioral,  
658 physiological and gene expression traits in outbred CFW mice. *Nature genetics*. 2016;  
659 48(8):919–926.

- 660 **Pividori M**, Rajagopal PS, Barbeira A, Liang Y, Melia O, Bastarache L, Park Y, Consortium  
661 G, Wen X, Im HK. PhenomeXcan: Mapping the genome to the phenome through the  
662 transcriptome. *Science Advances*. 2020; 6(37):eaba2083.
- 663 **Reynolds T**, Johnson EC, Huggett SB, Bubier JA, Palmer RH, Agrawal A, Baker EJ, Chesler EJ.  
664 Interpretation of psychiatric genome-wide association studies with multispecies het-  
665 erogeneous functional genomic data integration. *Neuropsychopharmacology*. 2021;  
666 46(1):86–97.
- 667 **So HC**, Chau CKL, Chiu WT, Ho KS, Lo CP, Yim SHY, Sham PC. Analysis of genome-wide  
668 association data highlights candidates for drug repositioning in psychiatry. *Nature*  
669 *neuroscience*. 2017; 20(10):1342–1349.
- 670 **Solberg Woods LC**, Palmer AA. Using heterogeneous stocks for fine-mapping genetically  
671 complex traits. *Rat genomics*. 2019; p. 233–247.
- 672 **Stegle O**, Parts L, Durbin R, Winn J. A Bayesian framework to account for complex non-  
673 genetic factors in gene expression levels greatly increases power in eQTL studies. *PLoS*  
674 *computational biology*. 2010; 6(5):e1000770.
- 675 **Visscher PM**, Wray NR, Zhang Q, Sklar P, McCarthy MI, Brown MA, Yang J. 10 years of  
676 GWAS discovery: biology, function, and translation. *The American Journal of Human*  
677 *Genetics*. 2017; 101(1):5–22.
- 678 **Watanabe K**, Taskesen E, Van Bochoven A, Posthuma D. Functional mapping and anno-  
679 tation of genetic associations with FUMA. *Nature communications*. 2017; 8(1):1–11.
- 680 **Wheeler HE**, Shah KP, Brenner J, Garcia T, Aquino-Michaels K, Consortium G, Cox NJ,  
681 Nicolae DL, Im HK. Survey of the heritability and sparse architecture of gene expression  
682 traits across human tissues. *PLoS genetics*. 2016; 12(11):e1006423.
- 683 **Wood AR**, Esko T, Yang J, Vedantam S, Pers TH, Gustafsson S, Chu AY, Estrada K, Kutalik  
684 Z, Amin N, et al. Defining the role of common variation in the genomic and biological  
685 architecture of adult human height. *Nature genetics*. 2014; 46(11):1173–1186.
- 686 **Wray NR**, Goddard ME, Visscher PM. Prediction of individual genetic risk to disease from  
687 genome-wide association studies. *Genome research*. 2007; 17(10):1520–1528.
- 688 **Yengo L**, Sidorenko J, Kemper KE, Zheng Z, Wood AR, Weedon MN, Frayling TM,  
689 Hirschhorn J, Yang J, Visscher PM, et al. Meta-analysis of genome-wide association  
690 studies for height and body mass index in 700000 individuals of European ancestry.  
691 *Human molecular genetics*. 2018; 27(20):3641–3649.
- 692 **Zhao X**, Gu J, Li M, Xi J, Sun W, Song G, Liu G. Pathway analysis of body mass index genome-  
693 wide association study highlights risk pathways in cardiovascular disease. *Scientific*  
694 *reports*. 2015; 5(1):1–7.
- 695 **Zhou X**, Carbonetto P, Stephens M. Polygenic modeling with bayesian sparse linear  
696 mixed models. *PLoS Genet*. 2013 Feb; 9(2):e1003264–e1003264.
- 697 **Zou H**, Hastie T. Regularization and variable selection via the elastic net. *Journal of the*  
698 *royal statistical society: series B (statistical methodology)*. 2005; 67(2):301–320.



699 **Supplementary information**

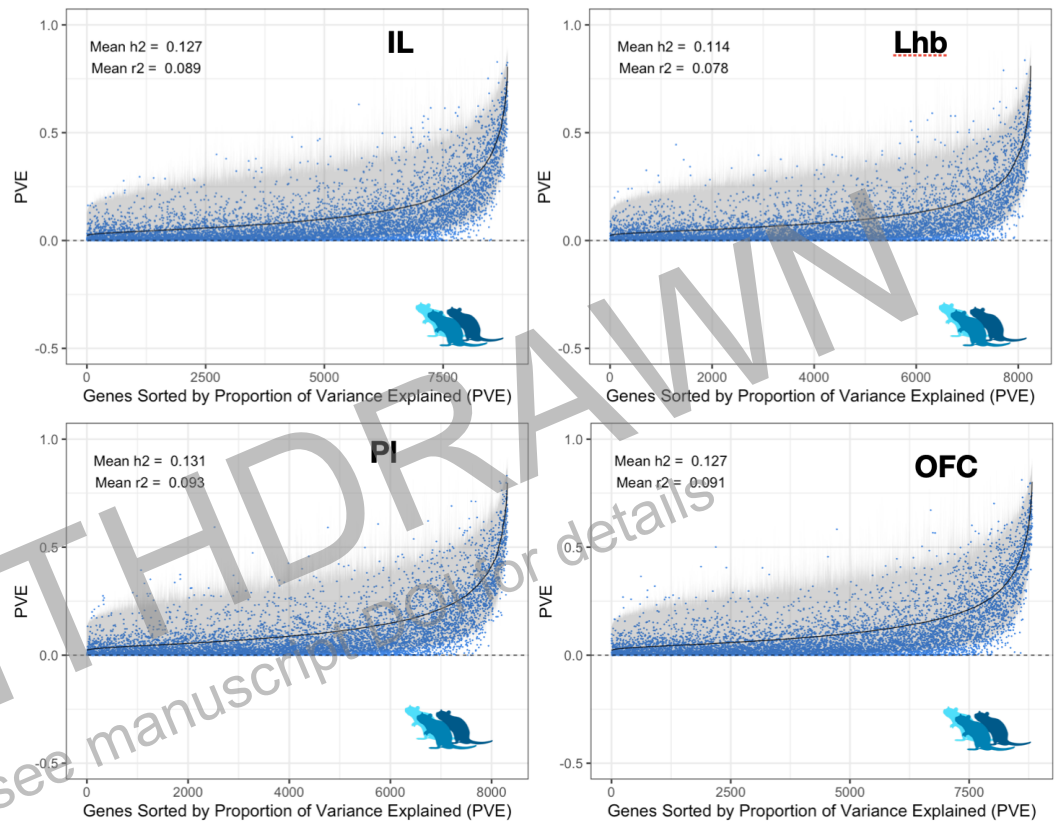

**Figure S1. Gene expression was heritable [8.86-10.12%] and comparable across several brain tissues tested (Infralimbic Cortex, IL; Lateral Habenula, Lhb; Prelimbic Cortex, PL; Orbitofrontal Cortex, OFC) in rats.** We refer to heritability ( $h^2$ , cis-heritability within 1Mb) as the proportion of variance explained (PVE). Across all brain tissues tested, heritability estimates were significantly correlated ( $R = [0.58 - 0.83]$ ,  $P < 2.20 \times 10^{-16}$ ).

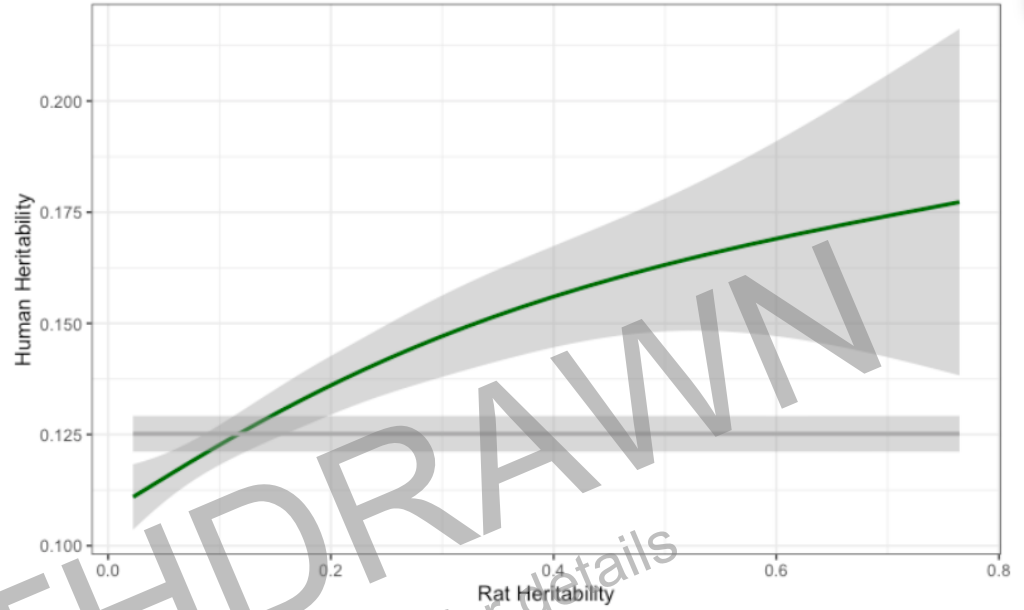

**Figure S2. Heritability of gene expression was correlated between rats and humans.** We found a significant correlation ( $R = 0.07$ ,  $P = 4.34 \times 10^{-12}$ ) between heritability estimates in rats and humans. Confidence intervals are represented as gray bars. The gray line represents the null distribution.

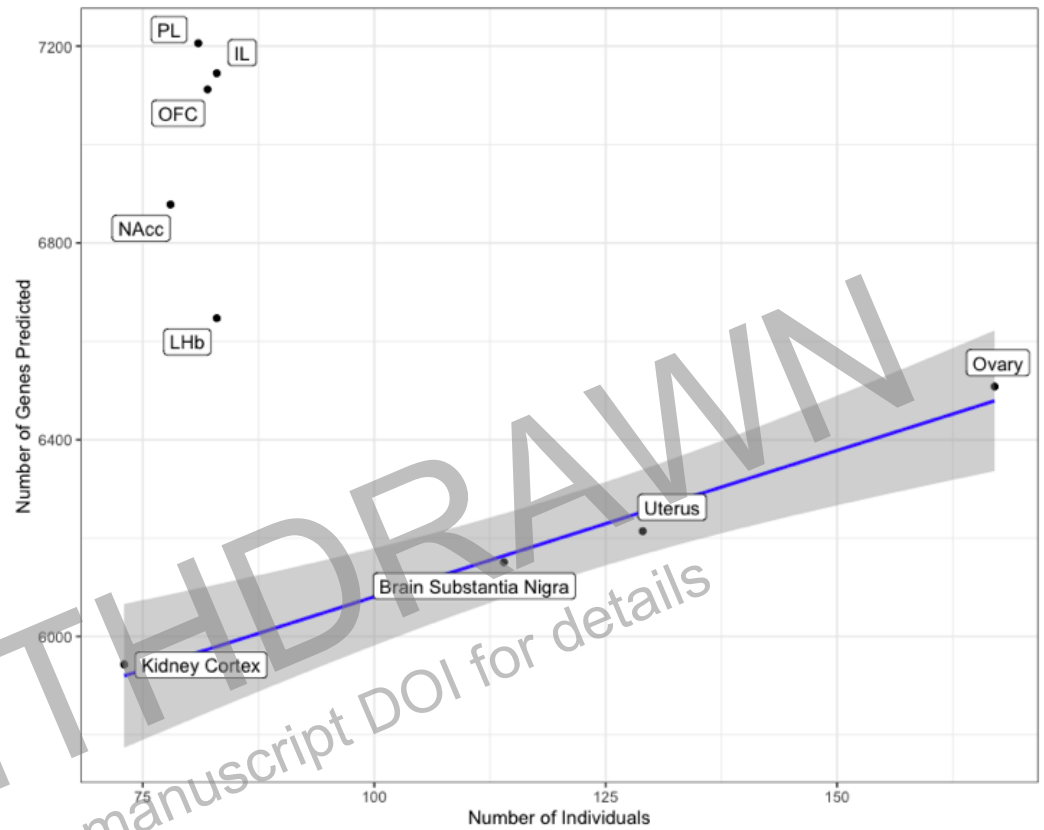

**Figure S3. Prediction was greater in rat tissues than that in human GTEx tissues.**

The number of predicted genes across all five rat tissues was greater than those in GTEx human tissues with similar sample size. To ensure fair comparison, we included the same subset of genes that were orthologous across all tested tissues.

Nucleus Accumbens Core (NAcc) Infralimbic Cortex (IL) Lateral Habenula (LHb) Prelimbic Cortex (PL) Orbitofrontal Cortex (OFC)

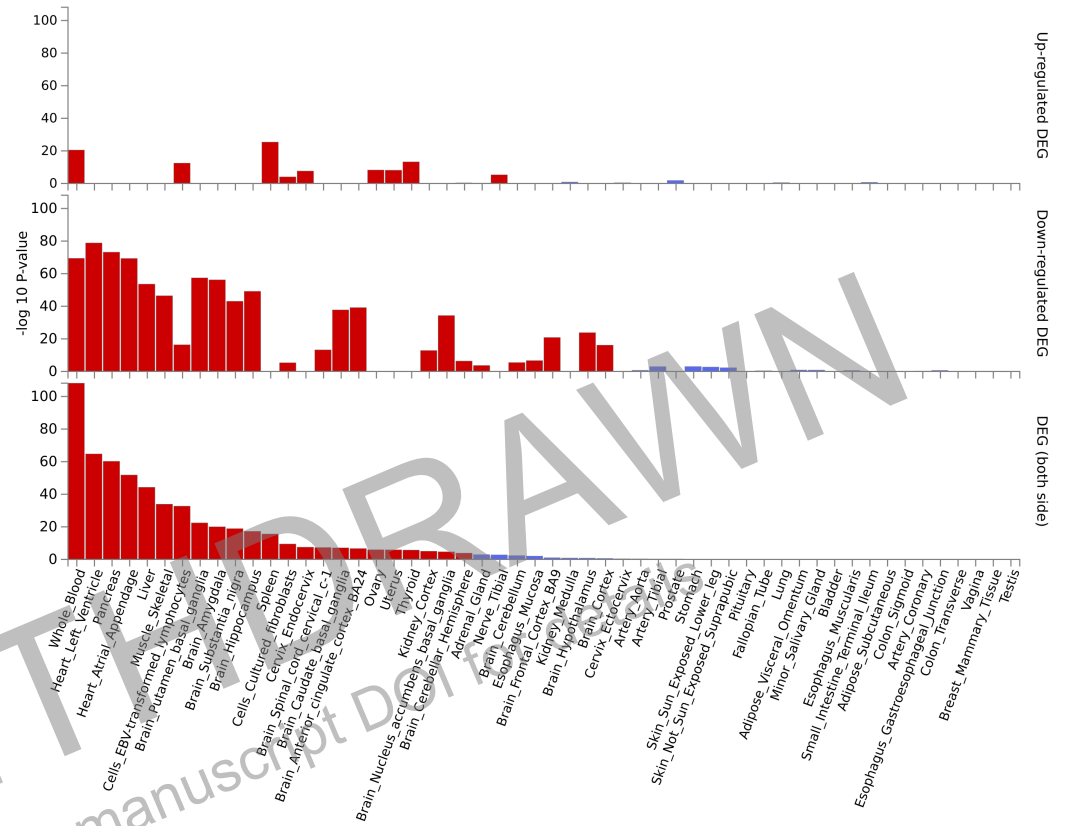

**Figure S4. Tissue analysis revealed substantial enrichment in multiple relevant tissues, including heart, pancreas, muscle, liver, and central nervous system. Significantly enriched sets ( $P < 0.05$ ) are highlighted in red.**

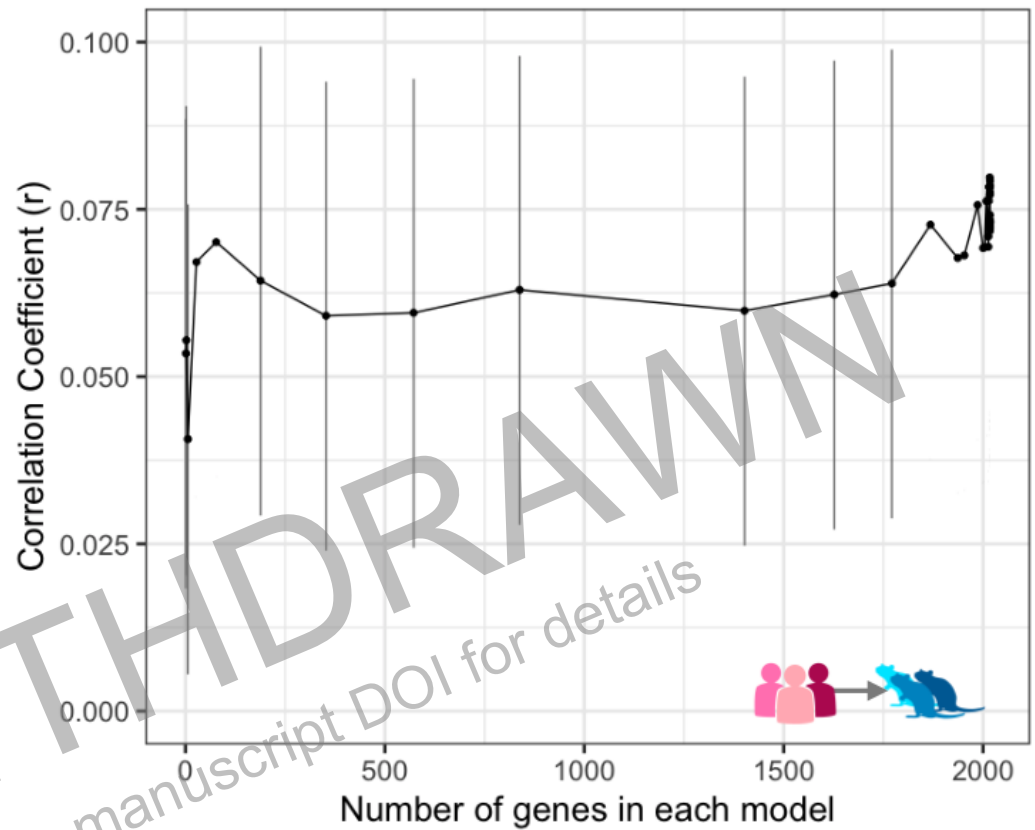

**Figure S5. Correlation between observed body length vs height PTRS.**

Correlation between human-derived height PTRS and observed body length in rats for the 37 regularization parameters used in building the PTRS. Strikingly, human-derived height PTRS significantly predicted body length in rats; that is, the correlation between PTRS and observed rat body length was significant for all the elastic net regularization parameters that included at least 27 genes (maximum  $R = 0.08$ ,  $P = 8.57 \times 10^{-6}$ ).



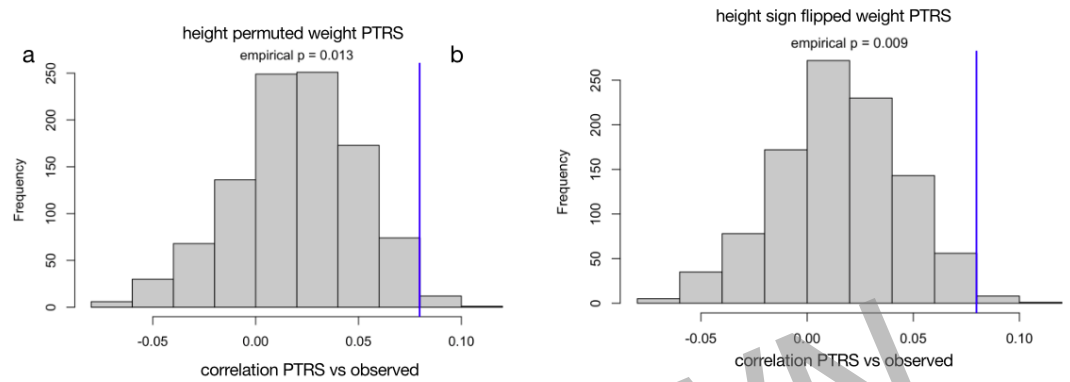

**Figure S6. Simulated PTRS with permuted and sign flipped weights** Blue vertical line indicates the observed correlation with the true PTRS.

(a) Distribution of correlation between weight-permuted height PTRS and observed body length in rats. All 37 weights were permuted and the best performing model for each simulation was selected. Within each of the 1000 simulations, the permutation of weights across genes were consistent for all 37 models, mimicking the set of actual PTRS weights.

(b) Distribution of correlation between sign-flipped height PTRS and observed body length in rats. All 37 model weights were permuted and the best performing model for each simulation was selected. Within each of the 1,000 simulations, the permutation of weights across genes were consistent for all 37 models, mimicking the set of actual PTRS weights.

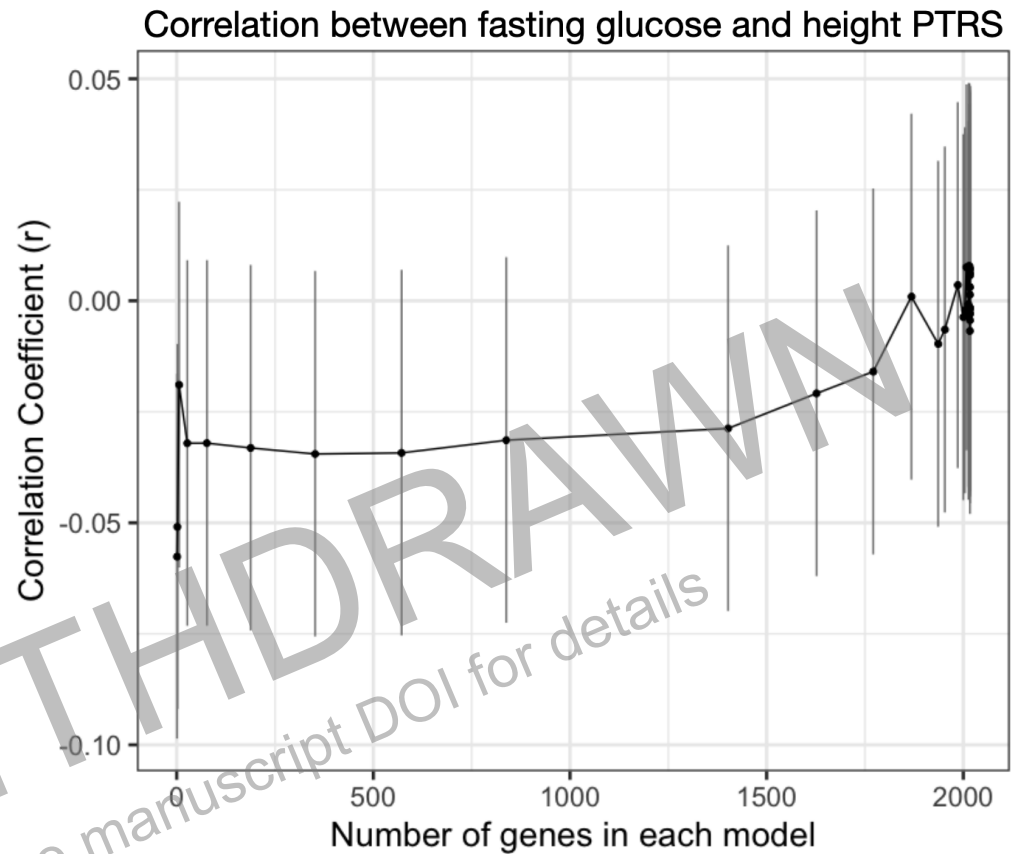

**Figure S7. Human derived PTRS weights did not predict observed fasting glucose levels in rats.** Human-derived height PTRS in rats was not correlated with observed fasting glucose levels in the target rat set ( $R = 0.008$ ,  $P = 7.09 \times 10^{-1}$ ), which served as a negative control.
