# 1 RatXcan: Framework for translating 2 genetic results between species via 3 transcriptome-wide association 4 analyses

5 **Natasha Santhanam<sup>1†</sup>, Sandra Sanchez-Roige<sup>2,3†</sup>, Yanyu Liang<sup>1</sup>,**  
6 **Apurva S. Chitre<sup>3</sup>, Daniel Munro<sup>3,4</sup>, Denghui Chen<sup>3</sup>, Riyan Cheng<sup>3</sup>,**  
7 **Festus Nyasimi<sup>1</sup>, Margaret Perry<sup>1</sup>, Jianjun Gao<sup>3</sup>, Anthony M. George<sup>5</sup>,**  
8 **Alex Gileta<sup>3</sup>, Katie Holl<sup>6</sup>, Alesa Hughson<sup>7</sup>, Christopher P. King<sup>8</sup>,**  
9 **Alexander C. Lamparelli<sup>9</sup>, Connor D. Martin<sup>10</sup>, Angel Garcia**  
10 **Martinez<sup>11</sup>, Sabrina Mi<sup>1</sup>, Celine L. St. Pierre<sup>3</sup>, Jordan Tripi<sup>11</sup>, Tengfei**  
11 **Wang<sup>9</sup>, Hao Chen<sup>9</sup>, Shelly Flagel<sup>7</sup>, Keita Ishiwari<sup>8,12</sup>, Paul Meyer<sup>6</sup>,**  
12 **Laura Saba<sup>13</sup>, Leah C. Solberg Woods<sup>14</sup>, Oksana Polesskaya<sup>3</sup>,**  
13 **Abraham A. Palmer<sup>3,4\*</sup>, Hae Kyung Im<sup>1\*</sup>**

## \*For correspondence:

[aap@ucsd.edu](mailto:aap@ucsd.edu) (AAP);  
[haky@uchicago.edu](mailto:haky@uchicago.edu) (HKI)

†These authors  
contributed equally to this  
work

## Present address:

<sup>5</sup>Department of Psychiatry,  
University of California San  
Diego, La Jolla, CA, USA;  
<sup>¶</sup>Genetic Medicine,  
University of Chicago, US

14 <sup>1</sup>Department of Medicine, Section of Genetic Medicine, The University of  
15 Chicago, Chicago, IL, 60637, USA; <sup>2</sup>Department of Medicine, Division of  
16 Genetic Medicine, Vanderbilt University Medical Center, Nashville, TN,  
17 USA; <sup>3</sup>Department of Psychiatry, University of California San Diego, La  
18 Jolla, CA, 92093, USA; <sup>4</sup>Department of Integrative Structural and  
19 Computational Biology, Scripps Research, La Jolla, CA; <sup>5</sup>University at  
20 Buffalo, Clinical and Research Institute on Addictions University at  
21 Buffalo, Buffalo, NY, 14203, USA; <sup>6</sup>Medical College of Wisconsin,  
22 Department of Pediatrics, Milwaukee, WI, 53226, USA; <sup>7</sup>University of  
23 Michigan, Department of Psychiatry, Ann Arbor, MI, 48109, USA;  
24 <sup>8</sup>University at Buffalo, Department of Psychology, Buffalo, NY, 14260,  
25 USA; <sup>9</sup>Institute for Genomic Medicine, University of California San Diego,  
26 La Jolla, CA, 92093, USA; <sup>10</sup>Department of psychology, University of  
27 California Los Angeles, Los Angeles, CA, 90095, USA; <sup>11</sup>University of  
28 Tennessee Health Science Center, Department of Pharmacology,  
29 Addiction Science and Toxicology, Memphis, TN, 38163, USA; <sup>12</sup>University  
30 at Buffalo, Pharmacology and Toxicology University at Buffalo, Buffalo,  
31 NY, 14203, USA; <sup>13</sup>University of Colorado Anschutz Medical Campus,  
32 Department of Pharmaceutical Sciences, Aurora, CO 80045, USA; <sup>14</sup>Wake  
33 Forest University School of Medicine, Department of Internal Medicine,  
34 Winston-Salem, NC, 27157, USA

35

---

36 **Abstract** We developed a framework for identifying trait-associated genes in  
37 rats and facilitating the transfer of polygenic evidence across species by  
38 expanding the transcriptome-wide association (TWAS) approach to rats. Our  
39 analysis successfully trained transcript predictors for over 8000 genes in each of  
40 the five brain regions of rats, revealing several shared properties of gene  
41 regulation with humans. Moreover, mirroring trends observed in humans, our  
42 findings showed that sparse predictors using variants in cis are more effective  
43 than polygenic predictors and that gene expression prediction in rats is highly  
44 correlated across brain regions. Importantly, our analysis also identified a  
45 significant overlap between genes associated with rat and human body length  
46 and BMI, indicating rat models may be useful for studying the genetic basis of  
47 complex traits in humans. RatXcan represents a valuable tool for uncovering  
48 shared biological mechanisms of complex traits across species, with potential  
49 applications in a wide range of research fields.

50

---

## 51 Introduction

52 Over the last decade, genome-wide association studies (GWAS) have identified  
53 numerous genetic loci that contribute to biomedically important traits [*Visscher*  
54 *et al.*, 2017]. GWAS have demonstrated that most traits have a highly polygenic  
55 architecture, meaning that numerous genetic variants with individually small ef-  
56 fects confer risk [*Loos*, 2020]. However, translating these results into meaning-  
57 ful biological discoveries remains extremely challenging [*Lewis and Vassos*, 2020,  
58 *Martin et al.*, 2019, *Alliance et al.*, 2021].

59 Model organisms provide a system in which the effect of genotype, genetic  
60 manipulations, and environmental exposures can be experimentally tested. Whereas  
61 the tools for using model organisms to study *individual* genes are well established,  
62 there are no satisfactory methods for studying the *polygenic* signals obtained  
63 from GWAS in model organisms.

64 To start addressing this problem, we extend the TWAS framework [*Gamazon*  
65 *et al.*, 2015] to rats so that the unit of analysis are genes rather than rats. We  
66 call this approach RatXcan. Following our human pipeline, we investigate the ge-  
67 netic architecture of gene expression traits in rats and compare them to humans.  
68 Then, we train genetic predictors of gene expression traits in rats and perform  
69 association between the latter and rat body size traits.

## 70 Results

### 71 Experimental setup

72 To build a framework for translating genetic results between species, we followed  
73 the experimental setup illustrated in Fig. 1. In the *training stage* (Fig. 1a), we inves-  
74 tigated the genetic architecture of gene expression and built prediction models  
75 of gene expression in rats. We used genotype and transcriptome data from five  
76 brain regions sampled from 88 heterogeneous stock (HS) rats, generated by the  
77 [NIDA Center for GWAS for Outbred rats](#) (Fig. 1a). We selected HS rats because  
78 they are a well characterized, outbred mammalian population for which dense  
79 genotype, phenotype, and gene expression data are available in thousands of  
80 subjects [*Solberg Woods and Palmer*, 2019, *Chitre et al.*, 2020, *Keele et al.*, 2018,  
81 *Crouse et al.*, 2022]. In the *association stage* (Fig. 1b), we used genotype data  
82 to predict the transcriptome in a non-overlapping *target set* of 3,407 rats. We  
83 tested for associations between the genetically predicted gene expression and  
84 body length by adapting the PrediXcan software, which was originally developed  
85 for use in humans [*Gamazon et al.*, 2015], to rats ('RatXcan').

### 86 Genetic Architecture of Gene Expression across Brain Tissues

87 To inform the optimal prediction model training, we examined the genetic archi-  
88 tecture of gene expression in HS rats by quantifying heritability and polygenicity

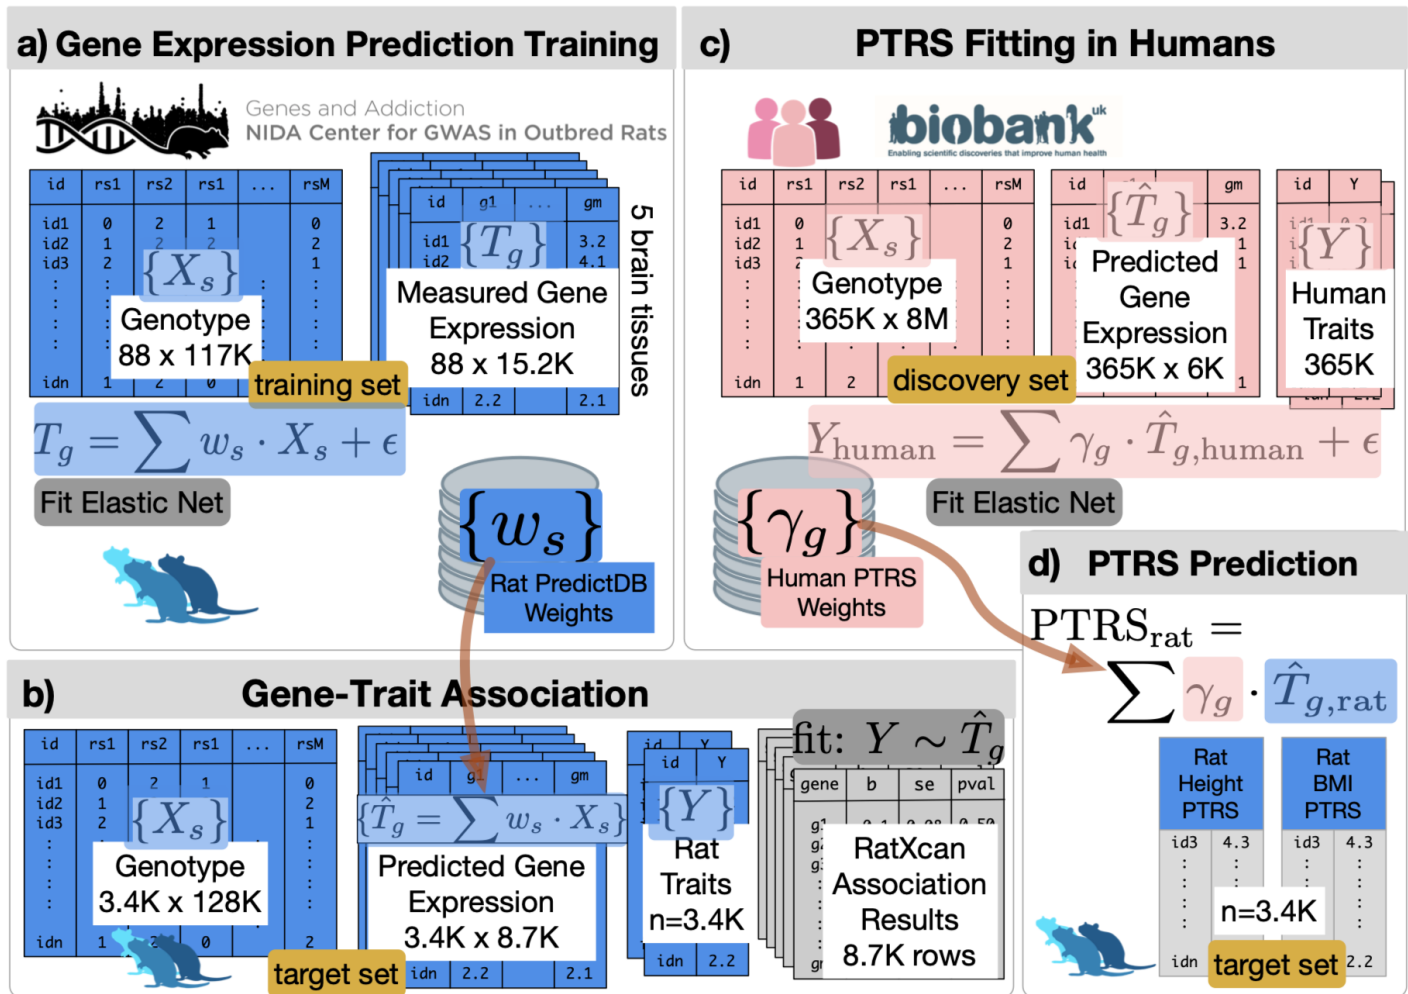

**Figure 1. Schematic representation of cross-species polygenic translation framework.**

The workflow was divided into 4 stages: a) gene expression prediction training, b) gene-trait association, c) PTRS fitting in humans, d) PTRS prediction. a) In the gene expression prediction training stage, we used genotype (117,155 SNPs) and gene expression data (15,216 genes) from samples derived from 5 brain regions in 88 rats. The prediction weights (rat PredictDB weights) are stored in predictdb.org. Rats used in this stage constitute the training set. b) In the gene-trait association stage, we used genotype and phenotype data from the target set of 3,407 rats (no overlap with training set rats). Predicted gene expression (8,567 genes for which prediction was possible) was calculated for all the 3,407 target set rats, and gene-trait associations were tested using RatXcan (N=1,463-3,110). We queried human gene-level associations from PhenomeXcan to estimate enrichment levels with our rat findings. c) Human PTRS weights were fitted using elastic net regression of height on predicted whole blood gene expression levels (7,002 genes) in the UK Biobank (N=356,476). d) The human PTRS weights will be used for complex trait prediction in rats. Prediction performance of PTRS will be used to calculate as the correlation (and partial correlation) between the predicted scores in rats and the observed traits. Analyses in rats are shown in blue and analyses in humans are shown in pink.

89 for five areas of brain tissue. Because the results for each tissue are similar, in  
90 the main text we summarize results for all tissues, highlighting the results for  
91 nucleus accumbens core; we present the remaining tissues in more detail in the  
92 supplement.

| <b>Brain Region</b>           | <b>#<br/>Rats</b> | <b># Genes<br/>Predicted</b> | <b>Average<br/><math>R^2</math></b> | <b>Average<br/>cis <math>h^2</math></b> |
|-------------------------------|-------------------|------------------------------|-------------------------------------|-----------------------------------------|
| Nucleus Accumbens Core (NAcc) | 78                | 8,567                        | 8.51%                               | 9.82%                                   |
| Infralimbic Cortex (IL)       | 83                | 8,856                        | 8.87%                               | 9.77%                                   |
| Lateral Habenula (LHb)        | 83                | 8,244                        | 7.78%                               | 8.86%                                   |
| Prelimbic Cortex (PL)         | 81                | 8,315                        | 9.33%                               | 10.12%                                  |
| Orbitofrontal Cortex (OFC)    | 82                | 8,821                        | 9.13%                               | 9.82%                                   |

**Table 1. Summary of heritability and prediction performance in rats.** The table shows the number of rats used in the prediction, number of genes predicted per model, the average prediction performance  $R^2$ , and average cis-heritability cis  $h^2$ , for all gene transcripts.

93 We calculated the heritability of expression for each gene by estimating the  
94 proportion of variance explained (PVE) using a Bayesian Sparse Linear Mixed  
95 Model (BSLMM) [Zhou et al., 2013]. We restricted the feature set to variants within  
96 1 Mb of the transcription start site of each gene since this is expected to capture  
97 most cis-eQTLs. Among the 15,216 genes considered, 3,438 genes were herita-  
98 ble (defined as having a 95% credible set lower boundary greater than 1%) in the  
99 nucleus accumbens core. The mean heritability ranged from 8.86% to 10.12% for  
100 all brain tissues tested (Table 1). Fig. 2a shows the heritability estimates for gene  
101 expression in the nucleus accumbens core, while Fig. S1 shows heritability esti-  
102 mates for other tissues. We identified a similar heritability distribution in humans  
103 (Fig. 2b, Fig. S2) based on whole blood samples from GTEx.

104 Next, to evaluate the polygenicity of gene expression levels, we examined  
105 whether predictors with more polygenic or sparse architecture correlate better  
106 with observed expression. We fitted elastic net regression models using a range  
107 of mixing parameters from 0 to 1 (Fig. 2c). The leftmost parameter value of 0  
108 corresponds to ridge regression, which is fully polygenic and uses all cis-variants.  
109 Larger values of the mixing parameters yield more sparse predictors, with the  
110 number of variants decreasing as the mixing parameter increases. The rightmost  
111 value of 1 corresponds to lasso regression, which yields the most sparse predic-  
112 tor within the elastic net family.

113 We used the 10-fold cross-validated Pearson correlation ( $R$ ) between predicted  
114 and observed values as a measure of performance (Spearman correlation yielded  
115 similar results). We observed a substantial drop in performance towards the

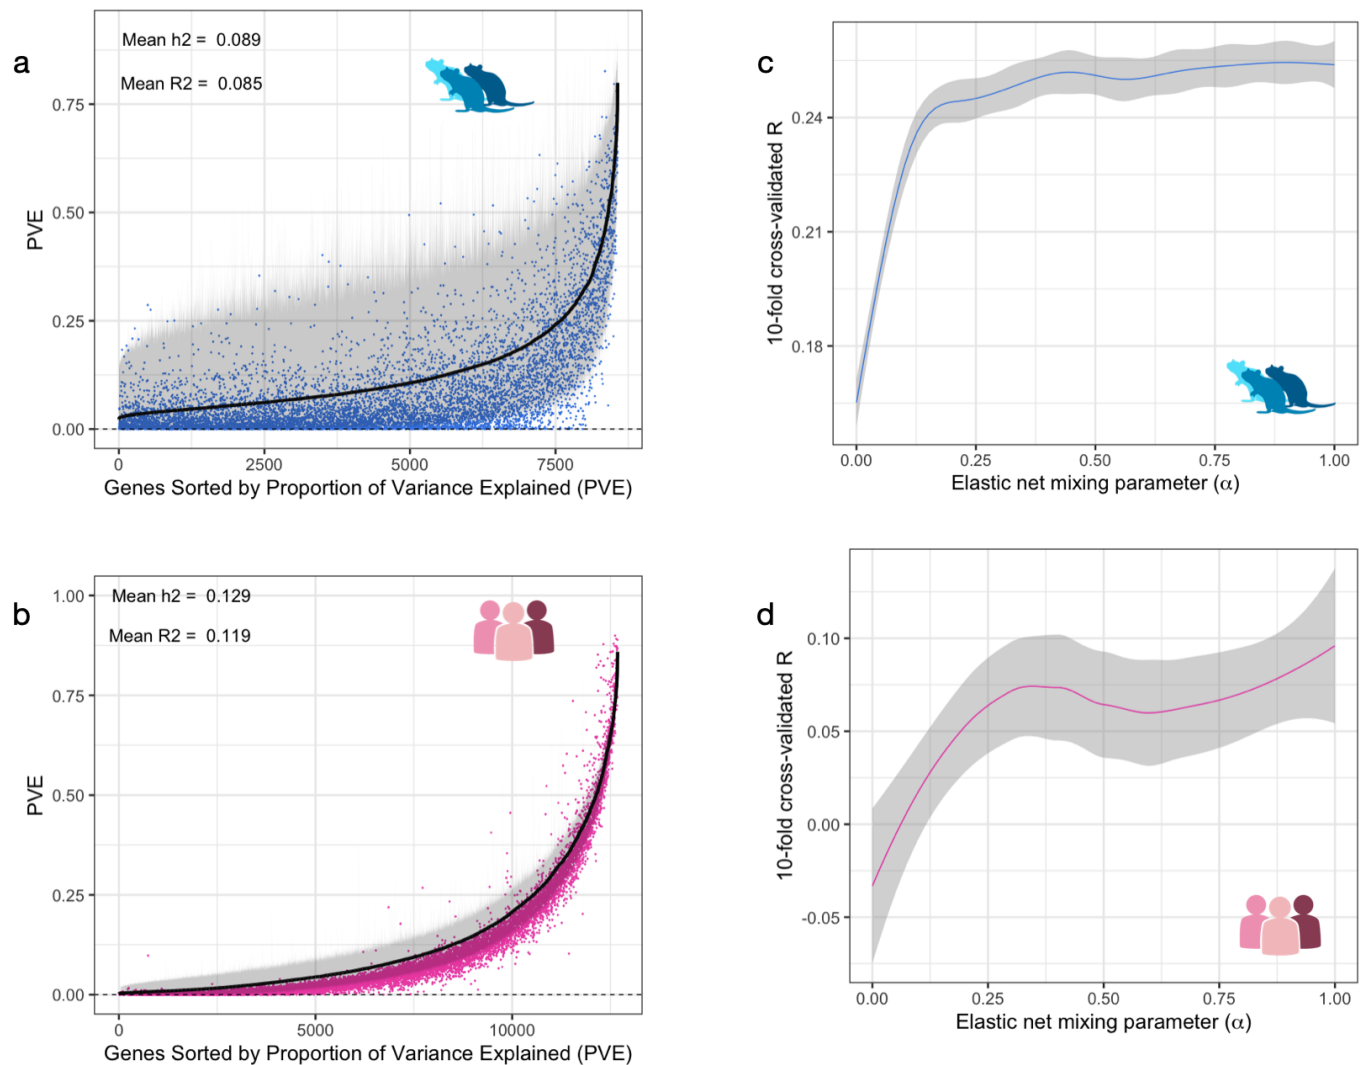

**Figure 2. Heritability and sparsity of gene expression in both rats and humans.** a) cis-heritability of gene expression levels in the nucleus accumbens core of rats calculated using BSLMM (black). We show only genes ( $N = 10,268$ ) that have an equivalent ortholog in the GTEx population. On the x-axis, genes are ordered by their heritability estimates. 95% credible sets are shown in gray for each gene. Blue dots indicate the prediction performance (cross validated  $R^2$  between predicted and observed expression). b) cis heritability of gene expression levels in whole blood tissue in humans from GTEx. We show only the same 10,268 orthologous genes. On the x-axis, genes are ordered by their heritability estimates. 95% credible sets are shown in gray for each gene. Pink dots indicate the prediction performance (cross validated  $R^2$  between predicted and observed expression). c) Cross validated prediction performance in rats (Pearson correlation  $R$ ) as a function of the elastic net parameter ranging from 0 to 1. d) Cross validated prediction performance in humans (Pearson correlation  $R$ ) as a function of the elastic net parameter ranging from 0 to 1.

116 more polygenic end of the mixing parameter spectrum (Fig. 2c). We observed  
117 similar results using human gene expression data from whole blood samples in  
118 GTEx individuals (Fig. 2d). Overall, these results indicate that the genetic architec-  
119 ture of gene expression in HS rats (detectable with the currently available sample  
120 size) is sparse, similar to that of humans [*Wheeler et al., 2016*].

### 121 **Generation of Prediction Models of Gene Expression in Rats**

122 We trained elastic net predictors for all genes in all five brain regions. Based  
123 on the relative performance across different elastic net mixing parameters, we  
124 chose a parameter value of 0.5, which yielded slightly less sparse predictors than  
125 lasso but provided robustness to missing or low quality variants; this is the same  
126 value that we have chosen in the past for humans datasets [*Gamazon et al., 2015*].  
127 The procedure yielded 8,244-8,856 genes across five brain tissues from the avail-  
128 able 15,216 genes (Table 1). The 10-fold cross-validated prediction performance  
129 ( $R^2$ ) ranged from 0 to 80% with a mean of 8.51% in the nucleus accumbens core.  
130 As shown in Table 1, mean prediction  $R^2$  was consistently lower than mean her-  
131 itability for all tissues, as is expected since genetic prediction performance is re-  
132 stricted by its heritability. Prediction performance values followed the heritability  
133 curve, confirming that genes with highly heritable expression tend to be better  
134 predicted than genes with low heritability in both HS rats and humans (Fig. 2a-b).  
135 Interestingly, we identified better prediction performance in HS rats than in hu-  
136 mans (Fig. S3), despite heritability of gene expression being similar across species  
137 (Fig. 2a-b).

138 In Fig. 3a-b, we show the prediction performance of the best predicted genes  
139 in HS rats (*Mgmt*,  $R^2 = 0.72$ ) and humans (*RPS26*,  $R^2 = 0.74$ ). Across all genes,  
140 we found that the prediction performance in HS rats was correlated with that of  
141 humans ( $R = 0.061$ ,  $P = 8.03 * 10^{-6}$ ; Fig. 3c). Furthermore, performance per gene  
142 in different tissues was similar in both HS rats (Fig. 3d) and humans (Fig. 3e),  
143 namely, genes that were well-predicted in one tissue were also well-predicted  
144 in another tissue. Correlation of prediction performance across tissues ranged  
145 from 58 to 84% in HS rats and 42 to 69% in humans.

146 Having established the similarity of the genetic architecture of gene expres-  
147 sion between rats and humans, we transitioned to the *association stage*.

### 148 **PrediXcan/TWAS Implementation in Rats (RatXcan)**

149 To extend the PrediXcan/TWAS framework to rats, we developed RatXcan. We  
150 used the predicted weights from the *training stage* to estimate the genetically reg-  
151 ulated expression in the *target set* of 3,407 densely genotyped HS rats. We then  
152 tested the association between predicted expression and body length in the tar-  
153 get set.

154 We identified 90 Bonferroni significant genes ( $P(0.05/5388) = 9.28 * 10^{-6}$ ) in 57

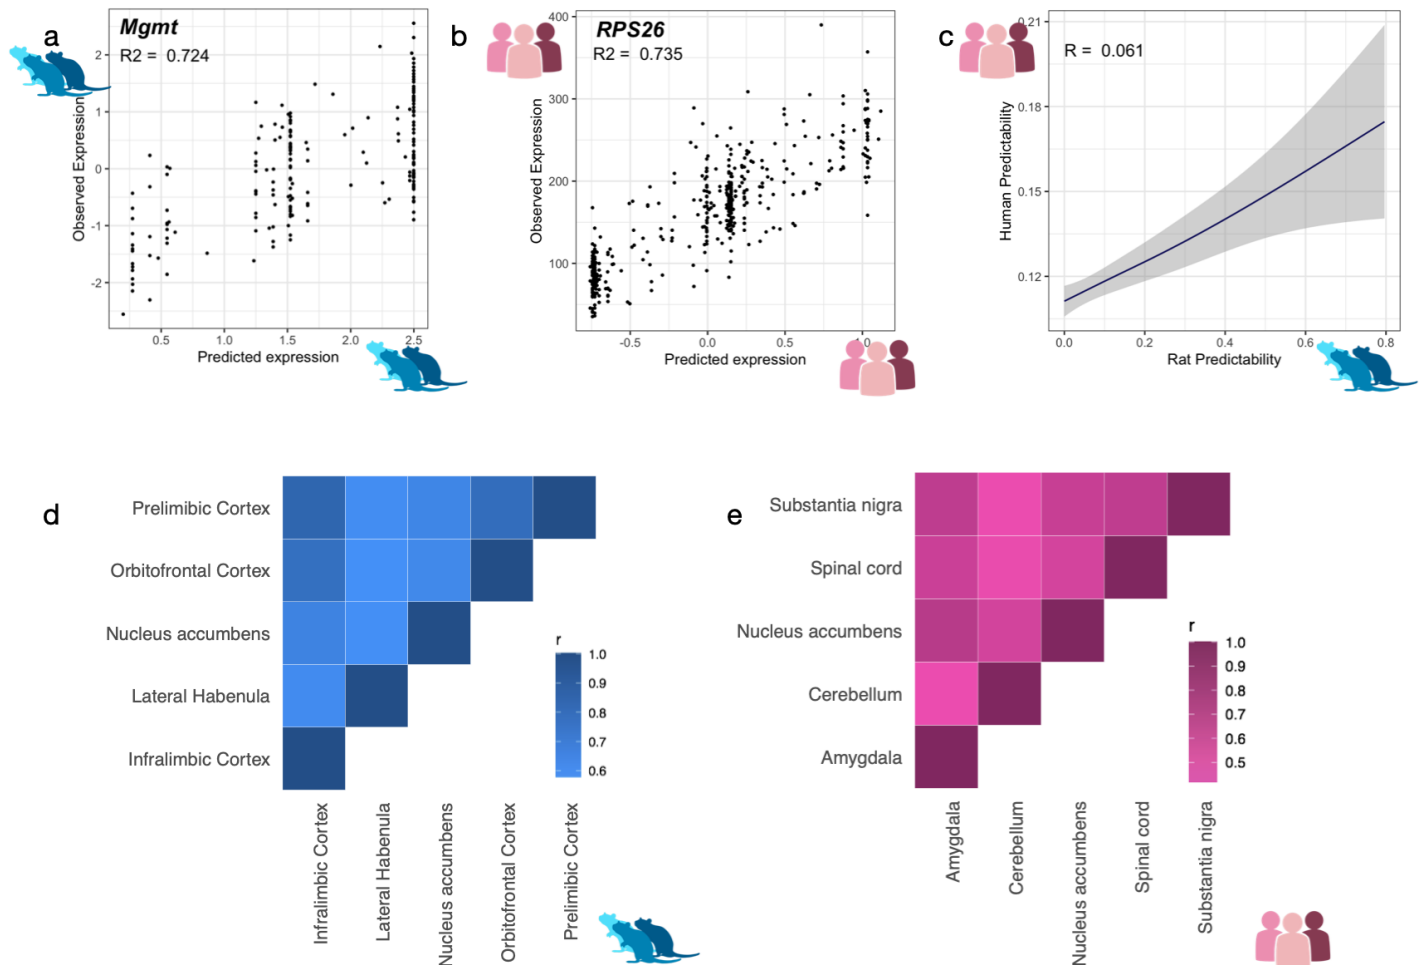

**Figure 3. Shared genetic architecture of gene expression in rats and humans** a) Comparison of predicted vs. observed expression for a well predicted gene in rats (*Mgmt*,  $R^2 = 0.72$ ,  $R = 0.65$ ,  $P < 2.20 \times 10^{-16}$ ). b) In humans, predicted and observed expression for *RPS26* were significantly correlated ( $R^2 = 0.74$ ,  $R = 0.86$ ,  $P < 2.20 \times 10^{-16}$ ). c) Prediction performance was significantly correlated across species ( $R = 0.06$ ,  $P = 8.03 \times 10^{-06}$ ) d-e) and across all five brain tissues tested in rats and humans. In rats, within tissue prediction performance ranged from ( $R = [0.58 - 0.84]$ ,  $P < 2.20 \times 10^{-16}$ ). In humans, the range was [ $R = 0.42 - 0.69$ ,  $P < 2.20 \times 10^{-16}$ ].



155 distinct loci separated by  $\pm 1$  Mb for rat body length (Fig. 4a; Supplementary Ta-  
156 ble 1). Among the 90 significant genes, 30.46% had human orthologs previously  
157 associated with height in GWAS. For example, *Tgfa*, which is related to growth  
158 pathways, including epidermal growth factor, was associated with body length in  
159 rats ( $P = 1.18 \times 10^{-9}$ ) and nominally associated with height in humans [**Comuzzie**  
160 **et al., 2012**] ( $P = 8.00 \times 10^{-6}$ ). To evaluate whether trait-associated genes identi-  
161 fied in HS rats were more significantly associated with the corresponding traits  
162 in humans, we performed enrichment analysis. Specifically, we selected genes  
163 that were nominally associated with HS rat body length ( $P < 0.05$ ) and compared  
164 the p-value from the analogous human trait (height) against the background dis-  
165 tribution of height-associated genes identified in GWAS. Given the large sample  
166 size of human height GWAS, we expected the p-values for of height-associated  
167 genes (shown in pink, Fig. 4b) to depart substantially from the identity line (in  
168 gray). The subset of genes that were associated with rat body length (in blue,  
169 Fig. 4b) showed a major departure from the background distribution, indicating  
170 that body-length genes in rats were more significantly associated with human  
171 height than expected. To quantify the enrichment, we compared the p-value dis-  
172 tribution of all the genes with the distribution of the subset of genes that were  
173 nominally significantly associated with rat body length ( $P = 6.55 \times 10^{-10}$ ).

## 174 Discussion

175 Overwhelming evidence demonstrates that most complex diseases are extremely  
176 polygenic; however, there is an unmet need for methods that translate polygenic  
177 results to other species.

178 A critical first step to achieve the transfer of polygenic scores is the develop-  
179 ment of RatXcan, which is the rat version of PrediXcan [**Gamazon et al., 2015**], a  
180 well-established statistical tool that is used in human genetics. We showed that  
181 the genetic architecture of gene expression in rats is broadly similar to humans:  
182 they are heritable, sparse, and the degree of heritability is preserved across tis-  
183 sues; some of these observations are consistent with another recent publication  
184 that mapped eQTLs in HS rats [**Munro et al., 2022**]. Interestingly, despite the  
185 smaller sample sizes used to train our prediction models, rats showed better  
186 prediction than humans. This might reflect the fact that HS rats have a prepon-  
187 derance of common alleles [**Chitre et al., 2020**] whereas humans have numerous  
188 rare alleles that influence gene expression but are difficult to capture in predic-  
189 tion models. The superior prediction may also reflect the longer haplotype blocks  
190 that are present in HS rats relative to humans [**Chitre et al., 2020**], which reduces  
191 the multiple testing burden when mapping cis-eQTLs and likely facilitates predic-  
192 tor training.

193 Using RatXcan, we tested gene-level associations of body length, which had

194 been previously measured in rats. We chose height because of the availability of  
195 large human GWAS, relatively large genotyped HS rat cohort in which body length  
196 was known, and relatively unambiguous similarity between humans height and  
197 rat body length. We found substantial enrichment of trait-associated genes among  
198 orthologous human trait-associated genes.

199 There are several limitations in the current study. The sample size of the refer-  
200 ence transcriptome data in rats was limited. We would expect better predictabil-  
201 ity estimates in our elastic-net trained models with larger sample sizes. Further-  
202 more, we used gene expression data from human blood and rat nucleus accum-  
203 bens core because they were convenient datasets, but these tissues are not likely  
204 to be major mediators of height or body length. Second, we suspect that in  
205 both humans and rats, some gene-level associations may be confounded by link-  
206 age disequilibrium contamination and co-regulation. This problem is likely to be  
207 more serious in model organisms where even longer range LD exists. Finally, in-  
208 tegration of other omic data types (e.g., protein, methylation, metabolomics) and  
209 the use of cell-specific data may improve prediction accuracy and cross-species  
210 portability. It is worth noting that while we have shown success with humans and  
211 HS rats, it is still not clear whether more distantly related species, such as non-  
212 mammalian vertebrates or even insects, might also lend themselves to ortholog  
213 analysis and ultimately a cross-species transcriptome-based polygenic risk score.

214 Despite these limitations, we have developed a methodology for effectively  
215 and efficiently identifying orthologs between rats and humans, which should sup-  
216 port new and transformative experimental designs involving model organisms  
217 and enable the future development of a transcriptome-based polygenic risk score  
218 that is portable across species. Moreover, the RatXcan methodology provides a  
219 method to empirically validate traits that are intended to model or recapitulate  
220 aspects of human diseases in model systems. While the validity of these animal  
221 models has been a source of passionate debate, empirical evidence has been lim-  
222 ited. Our polygenic approach provides an empirical approach to this debate that  
223 has been urgently needed.

## 224 **Methods**

### 225 **Resource availability**

#### 226 **Lead contact**

227 Requests for further information, resources, and reagents should be directed to  
228 and will be fulfilled by one of the lead contacts, Hae Kyung Im ([haky@uchicago.edu](mailto:haky@uchicago.edu))  
229 or Abraham Palmer ([aapalmer@ucsd.edu](mailto:aapalmer@ucsd.edu))

#### 230 **Material availability**

231 This study did not generate new unique reagents.

## 232 **Experimental model and subject details**

233 The rats used for this study are part of a large multi-site project focused on ge-  
234 netic analysis of complex traits ([www.ratgenes.org](http://www.ratgenes.org)). N/NIH heterogeneous stock  
235 (HS) outbred rats are the most highly recombinant rat intercross available and  
236 are a powerful tool for genetic studies ([*Solberg Woods and Palmer, 2019*]; [*Chitre*  
237 *et al., 2020*]). HS rats were created in 1984 by interbreeding eight inbred rat  
238 strains (ACI/N, BN/SsN, BUF/N, F344/N, M520/N, MR/N, WKY/N and WN/N) and  
239 been maintained as an outbred population for almost 100 generations.

## 240 **Method details**

### 241 Genotype and expression data in the training rat set

242 For training the gene expression predictors, we used RNAseq and genotype data  
243 pre-processed for *Munro et al. [2022]*. We used 88 HS male and female adult rats,  
244 for which whole genome and RNA-sequencing information was available across  
245 five brain tissues [nucleus accumbens core (NAcc), infralimbic cortex (Il), prelim-  
246 bic cortex (PL), orbitofrontal cortex (OFC), and lateral habenula (Lhb); Table 1].  
247 Mean age was  $85.7 \pm 2.2$  for males and  $87.0 \pm 3.8$  for females. All rats were group  
248 housed under standard laboratory conditions and had not been through any pre-  
249 vious experimental protocols. Genotypes were determined using genotyping-by-  
250 sequencing, as described previously in [*Parker et al., 2016*], [*Chitre et al., 2020*]  
251 and [*Gileta et al., 2020*]. Bulk RNA-sequencing was performed using Illumina  
252 HiSeq 4000 with polyA libraries, 100 bp single-end reads, and mean library size of  
253 27M. Read alignment and gene expression quantification were performed using  
254 RSEM and counts were upper-quartile normalized, followed by additional quality-  
255 control filtering steps as described in *Munro et al. [2022]*. Gene-expression levels  
256 refer to transcript abundance for reads aligned to the gene's exons using the En-  
257sembl Rat Transcriptome.

258 For each gene, we inverse normalized the TPM values to account for outliers  
259 and fit a normal distribution. We then performed PEER factor analysis [*Stegle*  
260 *et al., 2010*]. We regressed out sex, batch number, batch center and 7 PEER fac-  
261 tors from the gene expression and saved the residuals for all downstream analy-  
262 ses.

### 263 Genotype and phenotype data in the target rat set

264 We used genotype and phenotype data from 3,407 HS rats (i.e., target set) re-  
265 ported in *Chitre et al. [2020]*. We used phenotypic information on body length  
266 (including tail), and fasting glucose. For each trait, sex, age, batch number and  
267 site were regressed out if they were significant and if they explained more than  
268 2% of the variance, as described in [*Chitre et al., 2020*].

## 269 Querying human gene-trait association results

270 To retrieve analogous human gene-trait association results, we queried PhenomeX-  
271 can, a web-based tool that serves gene-level association results for 4,091 traits  
272 based on predicted expression in 49 GTEx tissues [*Pividori et al., 2020*]. Ortholo-  
273 gous genes (N = 22,777) were mapped with Ensembl annotation, using the *biomart*  
274 R package and were one to one matched.

## 275 Estimating gene expression heritability

276 We calculated the cis-heritability of gene expression from the training set using a  
277 Bayesian sparse linear mixed model, BSLMM [*Zhou et al., 2013*], as implemented  
278 in GEMMA. We used variants within the  $\pm 1$ Mb window up- and down-stream of  
279 the transcription start and end of each gene annotated by Gencode v26 [*Frankish*  
280 *et al., 2021*]. We used the proportion of variance explained (PVE) generated by  
281 GEMMA as the measure of cis-heritability of gene expression. We then display  
282 only the PVE estimates of 10,268 genes that were also present in the human gene  
283 expression data.

284 Heritability of human gene expression, which was also calculated with BSLMM,  
285 was downloaded from the database generated by *Wheeler et al. [2016]*. Genes  
286 were also limited to the same 10,268 as above.

## 287 Examining polygenicity versus sparsity of gene expression

288 To examine the polygenicity versus sparsity of gene expression in rats, we iden-  
289 tified the optimal elastic net mixing parameter  $\alpha$ , as described in *Wheeler et al.*  
290 *[2016]*. Briefly, we compared the prediction performance of a range of elastic net  
291 mixing parameters spanning from 0 to 1 (11 values from 0 to 1, with steps of 0.1).  
292 If the optimal mixing parameter was closer to 0, corresponding to ridge regres-  
293 sion, we deemed gene expression trait to be polygenic. In contrast, if the optimal  
294 mixing parameter was closer to 1, corresponding to lasso, then the gene expres-  
295 sion trait was considered to be more sparse. We also restricted the number of  
296 genes in the pipeline to the 10,268 orthologous genes.

## 297 Training gene expression prediction in rats

298 To train prediction models for gene expression in rats, we used the training set  
299 of 88 rats described above and followed the elastic net pipeline from [predictdb.org](https://predictdb.org).  
300 Briefly, for each gene, we fitted an elastic net regression using the *glmnet* package  
301 in R. We only included variants in the cis region (i.e., 1Mb up and downstream of  
302 the transcription start and end). The regression coefficient from the best penalty  
303 parameter (chosen via *glmnet's* internal 10-fold cross validation [*Zou and Hastie,*  
304 *2005*]) served as the weight for each gene. The calculated weights ( $w_s$ ) are avail-  
305 able in [predictdb.org](https://predictdb.org). For the comparison of number of predictable genes across  
306 species, we ran the same cross-validated elastic net pipeline in four GTEx tissues  
307 with sample sizes similar to that of the rats: Substantia Nigra, Kidney Cortex,

308 Uterus and Ovary. To ensure fair comparison, we used the same number of  
309 genes that were orthologous across all four human tissues and rat tissues.

310 Estimating overlap and enrichment of genes between rats and humans  
311 For human transcriptome prediction used in the comparison with rats, we simply  
312 downloaded elastic net predictors trained in GTEx whole blood samples from  
313 the PredictDB portal, as previously done in humans [*Barbeira et al., 2021*]. This  
314 model was different from the ones used in the UK Biobank for calculating the  
315 PTRS weights (See Calculating PTRS in a rat target set).

316 We quantified the accuracy of the prediction models using a 10-fold cross val-  
317 idated correlation ( $R$ ) and correlation squared ( $R^2$ ) between predicted and ob-  
318 served gene expression [*Zou and Hastie, 2005*]. For the rat prediction models,  
319 we only included genes whose prediction performance was greater than 0.01 and  
320 had a non-negative correlation coefficient, as these genes were considered well  
321 predicted.

322 We tested the prediction performance of our elastic net model trained in nu-  
323 cleus accumbens core in an independent rat reference transcriptome set. We  
324 predicted expression in the reference set of 188 individuals and compared to  
325 observed genetic expression in the nucleus accumbens core.

## 326 **Quantification and Statistical Analysis**

### 327 **Implementing RatXcan**

328 We developed RatXcan, based on PrediXcan [*Gamazon et al., 2015*] [*Barbeira*  
329 *et al., 2018*] in humans. RatXcan uses the elastic net prediction models generated  
330 in the training set. In the prediction stage, we generated a predicted expression  
331 matrix for all genes in the rat target set, by fitting an additive genetic model:

$$332 \quad Y_g = \sum_k w_{k,g} X_k + \epsilon$$

333  $Y_g$  is the predicted expression of gene  $g$ ,  $w_{k,g}$  is the effect size of marker  $k$  for  
334 gene  $g$ ,  $X_k$  is the number of reference alleles of marker  $k$ , and  $\epsilon$  is the contribution  
335 of other factors that determine the predicted gene expression, assumed to be  
336 independent of the genetic component.

337 We then tested the association between the predicted expression matrix and  
338 body length. We fitted a linear regression of the phenotype on the predicted  
339 expression of each gene, which generated gene-level association results for all  
340 gene trait pairs.

341 Estimating overlap and enrichment of genes between rats and humans  
342 We queried PhenomeXcan to identify genes associated with human height. Phe-  
343 nomeXcan provides gene-level associations aggregated across all available GTEx  
344 tissues, as calculated by MultiXcan (an extension of PrediXcan) [*Barbeira et al.,*  
345 *2019*]. To this aim, we adapted MultiXcan to similarly aggregate our results across

346 the 5 tested brain tissues in rats. We used a Q-Q plot to inspect the level of enrich-  
347 ment across rat and human findings. To quantify enrichment, we used a Mann-  
348 Whitney test as implemented in R to discern whether the distribution of the p-  
349 values for genes in humans was the same for the genes that were and were not  
350 nominally significant in rats.

### 351 Calculating PTRS weights in the UK Biobank

We calculated human-derived height PTRS weights using elastic net with a mixing parameter of 0.5, as described in *Liang et al. [2022]*. We predicted expression levels in 356,476 UK Biobank unrelated participants of European descent using whole blood prediction models trained in GTEx. We used the prediction models trained with UTMOST based on grouped lasso, which borrows information across tissues to improve prediction performance [*Barbeira et al., 2020, Hu et al., 2019*]. The predicted expression was generated using high quality SNPs from Hapmap2 [*McCarthy et al., 2016*]. We performed elastic net regression with height as the predicted variable and the predicted expression matrix from 356,476 UK Biobank unrelated individuals of European descent. More specifically, for each regularization parameter  $\lambda$ , we selected weight parameters  $\gamma_g$  that minimized the mean squared difference between the predicted variable  $Y$  and prediction model  $X\gamma + \gamma_0$  where  $\hat{T}_g \in \mathbb{R}^{N \times 1}$  is the standardized predicted expression level of gene  $g$  across  $N$  individuals and  $\hat{C}_l \in \mathbb{R}^{N \times 1}$  is the the observed value of the  $l$ th standardized covariate:

$$\gamma^{EN} = \underset{\gamma}{\operatorname{argmin}} \frac{1}{N} \overbrace{\|Y - X\gamma - \gamma_0\|_2^2}^{\text{loss:ly}} + \lambda\alpha\|\gamma\|_1 + \lambda_a(1 - \alpha)(\|\gamma\|_2)^2$$
$$X := [\hat{T}_1, \dots, \hat{T}_m, C_1, \dots, C_L]$$

352 where  $\gamma_0$  is the intercept,  $m$  the number of genes,  $L$  is the number of covariates,  
353  $\|B\|_2^2$  is the  $l_2$  norm and the  $\|B\|_1$  is the  $l_1$  norm of the effect size vector.  $\alpha$  de-  
354 notes the elastic net mixing parameter and  $\lambda$  is the regularization parameter. 37  
355 different  $\lambda$ 's were used, generating 37 different sets of predictors. Covariates in-  
356 cluded age at recruitment (Data-Field 21022), sex (Data-Field 31), and the first 20  
357 genetic PCs. For more details, see *Liang et al. [2022]*. The values of the regulariza-  
358 tion parameters were chosen in a region likely to cover a wide range of sparsity  
359 in the resulting models, from very sparse, containing a couple of genes, to dense,  
360 containing all genes *Liang et al. [2022]*.

### 361 Code and Data Availability

362 The code used for this work is available at [https://github.com/hakyimlab/Rat\\_Genomics\\_](https://github.com/hakyimlab/Rat_Genomics_Paper_Pipeline)  
363 [Paper\\_Pipeline](https://github.com/hakyimlab/Rat_Genomics_Paper_Pipeline). Genotype and expression data are available through [*Munro et al.,*  
364 *2022*]. Prediction models for gene expression in all five brain tissues in rats are  
365 available at [predictdb.org](https://predictdb.org)

## 366 Acknowledgments

367 This research has been conducted using the UK Biobank Resource under Appli-  
368 cation Number 19526. We thank Natalia Gonzales and Christian Jones for help  
369 editing the paper. The abstract's style was improved by using chatGPT itera-  
370 tively. This work was partially supported by DP1DA054394 (SSR), P30DK020595  
371 and R01CA242929 (HKI, NS, MP), P30DA044223 and R24 AA013162 (LS), P50DA037844  
372 (AAP)

## 373 Author contributions

374 A.A.P. and H.K.I. conceived the cross species PTRS and supervised the work. N.S.  
375 and Y.L. performed a large portion of the analyses. N.S. and S.S-R. analyzed and  
376 interpreted the results and wrote the initial draft of the manuscript. MP and FN  
377 performed analysis of some of the PTRS results. S.M., D.M., A.C., D.C., L.S-W, and  
378 O.P. pre-processed and analyzed the RNAseq, genotype, and phenotype data.  
379 R.C., J.G., A.M.G., A.G., K.H., A.H., C.P.K., C.L.S-P., J.T., T.W., H.C., S.F., K.I., P.M., L.S.  
380 were involved in various aspects of the collection of the rat physiological traits.  
381 All authors read, edited and approved the final version of the manuscript.

## 382 Competing interests

383 The authors declare no conflict of interest.

## 384 Ethics declaration

385 Not applicable.

## 386 References

- 387 **Alliance ICD**, Adeyemo A, Balaconis MK, Darnes DR, Ripatti S, Widen E, Zhou A. Responsi-  
388 ble use of polygenic risk scores in the clinic: potential benefits, risks and gaps. *Nature*  
389 *Medicine*. 2021; 27(11):1876–1884.
- 390 **Barbeira AN**, Bonazzola R, Gamazon ER, Liang Y, Park Y, Kim-Hellmuth S, Wang G, Jiang  
391 Z, Zhou D, Hormozdiari F, et al. Exploiting the GTEx resources to decipher the mecha-  
392 nisms at GWAS loci. *Genome biology*. 2021; 22(1):1–24.
- 393 **Barbeira AN**, Dickinson SP, Bonazzola R, Zheng J, Wheeler HE, Torres JM, Torstenson ES,  
394 Shah KP, Garcia T, Edwards TL, et al. Exploring the phenotypic consequences of tissue  
395 specific gene expression variation inferred from GWAS summary statistics. *Nature*  
396 *communications*. 2018; 9(1):1–20.
- 397 **Barbeira AN**, Melia OJ, Liang Y, Bonazzola R, Wang G, Wheeler HE, Aguet F, Ardlie KG, Wen  
398 X, Im HK. Fine-mapping and QTL tissue-sharing information improves the reliability of  
399 causal gene identification. *Genet Epidemiol*. 2020 Sep; n/a(n/a).

- 400 **Barbeira AN**, Pividori M, Zheng J, Wheeler HE, Nicolae DL, Im HK. Integrating predicted  
401 transcriptome from multiple tissues improves association detection. *PLoS genetics*.  
402 2019; 15(1):e1007889.
- 403 **Chitre AS**, Polesskaya O, Holl K, Gao J, Cheng R, Bimschleger H, Garcia Martinez A, George  
404 T, Gileta AF, Han W, et al. Genome-Wide Association Study in 3,173 Outbred Rats Identifies  
405 Multiple Loci for Body Weight, Adiposity, and Fasting Glucose. *Obesity*. 2020;  
406 28(10):1964–1973.
- 407 **Comuzzie AG**, Cole SA, Laston SL, Voruganti VS, Haack K, Gibbs RA, Butte NF. Novel  
408 genetic loci identified for the pathophysiology of childhood obesity in the Hispanic  
409 population. *PLoS one*. 2012; 7(12):e51954.
- 410 **Crouse WL**, Das SK, Le T, Keele G, Holl K, Seshie O, Craddock AL, Sharma NK, Comeau  
411 ME, Langefeld CD, Hawkins GA, Mott R, Valdar W, Solberg Woods LC. Transcriptome-  
412 wide analyses of adipose tissue in outbred rats reveal genetic regulatory mechanisms  
413 relevant for human obesity. *Physiological Genomics*. 2022 Jun; 54(6):206–219. doi:  
414 [10.1152/physiolgenomics.00172.2021](https://doi.org/10.1152/physiolgenomics.00172.2021).
- 415 **Frankish A**, Diekhans M, Jungreis I, Lagarde J, Loveland JE, Mudge JM, Sisu C, Wright JC,  
416 Armstrong J, Barnes I, et al. GENCODE 2021. *Nucleic acids research*. 2021; 49(D1):D916–  
417 D923.
- 418 **Gamazon ER**, Wheeler HE, Shah KP, Mozaffari SV, Aquino-Michaels K, Carroll RJ, Eyler AE,  
419 Denny JC, Nicolae DL, Cox NJ, et al. A gene-based association method for mapping  
420 traits using reference transcriptome data. *Nature genetics*. 2015; 47(9):1091–1098.
- 421 **Gileta AF**, Gao J, Chitre AS, Bimschleger HV, St Pierre CL, Gopalakrishnan S, Palmer AA.  
422 Adapting genotyping-by-sequencing and variant calling for heterogeneous stock rats.  
423 *G3: Genes, Genomes, Genetics*. 2020; 10(7):2195–2205.
- 424 **Hu Y**, Li M, Lu Q, Weng H, Wang J, Zekavat SM, Yu Z, Li B, Gu J, Muchnik S, et al. A statistical  
425 framework for cross-tissue transcriptome-wide association analysis. *Nature genetics*.  
426 2019; 51(3):568–576.
- 427 **Keele GR**, Prokop JW, He H, Holl K, Littrell J, Deal A, Francic S, Cui L, Gatti DM, Broman KW,  
428 Tschannen M, Tsaih SW, Zagloul M, Kim Y, Baur B, Fox J, Robinson M, Levy S, Flister MJ,  
429 Mott R, et al. Genetic Fine-Mapping and Identification of Candidate Genes and Variants  
430 for Adiposity Traits in Outbred Rats. *Obesity (Silver Spring, Md)*. 2018 Jan; 26(1):213–  
431 222. doi: [10.1002/oby.22075](https://doi.org/10.1002/oby.22075).
- 432 **Lewis CM**, Vassos E. Polygenic risk scores: from research tools to clinical instruments.  
433 *Genome medicine*. 2020; 12(1):1–11.
- 434 **Liang Y**, Pividori M, Manichaikul A, Palmer AA, Cox NJ, Wheeler HE, Im HK. Polygenic  
435 transcriptome risk scores (PTRS) can improve portability of polygenic risk scores across  
436 ancestries. *Genome Biol*. 2022 Jan; 23(1):23.
- 437 **Loos RJ**. 15 years of genome-wide association studies and no signs of slowing down.  
438 *Nature Communications*. 2020; 11(1):1–3.



- 439 **Martin AR**, Kanai M, Kamatani Y, Okada Y, Neale BM, Daly MJ. Clinical use of current poly-  
440 genic risk scores may exacerbate health disparities. *Nature genetics*. 2019; 51(4):584.
- 441 **McCarthy S**, Das S, Kretzschmar W, Delaneau O, Wood AR, Teumer A, Kang HM, Fuchs-  
442 berger C, Danecek P, Sharp K, et al. A reference panel of 64,976 haplotypes for geno-  
443 type imputation. *Nature genetics*. 2016; 48(10):1279.
- 444 **Munro D**, Palmer A, Mohammadi P. The regulatory landscape of multiple brain regions  
445 in outbred heterogeneous stock rats. . 2022; .
- 446 **Parker CC**, Gopalakrishnan S, Carbonetto P, Gonzales NM, Leung E, Park YJ, Aryee E, Davis  
447 J, Blizard DA, Ackert-Bicknell CL, et al. Genome-wide association study of behavioral,  
448 physiological and gene expression traits in outbred CFW mice. *Nature genetics*. 2016;  
449 48(8):919–926.
- 450 **Pividori M**, Rajagopal PS, Barbeira A, Liang Y, Melia O, Bastarache L, Park Y, Consortium  
451 G, Wen X, Im HK. PhenomeXcan: Mapping the genome to the phenome through the  
452 transcriptome. *Science Advances*. 2020; 6(37):eaba2083.
- 453 **Solberg Woods LC**, Palmer AA. Using heterogeneous stocks for fine-mapping genetically  
454 complex traits. *Rat genomics*. 2019; p. 233–247.
- 455 **Stegle O**, Parts L, Durbin R, Winn J. A Bayesian framework to account for complex non-  
456 genetic factors in gene expression levels greatly increases power in eQTL studies. *PLoS*  
457 *computational biology*. 2010; 6(5):e1000770.
- 458 **Visscher PM**, Wray NR, Zhang Q, Sklar P, McCarthy MI, Brown MA, Yang J. 10 years of  
459 GWAS discovery: biology, function, and translation. *The American Journal of Human*  
460 *Genetics*. 2017; 101(1):5–22.
- 461 **Wheeler HE**, Shah KP, Brenner J, Garcia T, Aquino-Michaels K, Consortium G, Cox NJ,  
462 Nicolae DL, Im HK. Survey of the heritability and sparse architecture of gene expression  
463 traits across human tissues. *PLoS genetics*. 2016; 12(11):e1006423.
- 464 **Zhou X**, Carbonetto P, Stephens M. Polygenic modeling with bayesian sparse linear  
465 mixed models. *PLoS Genet*. 2013 Feb; 9(2):e1003264–e1003264.
- 466 **Zou H**, Hastie T. Regularization and variable selection via the elastic net. *Journal of the*  
467 *royal statistical society: series B (statistical methodology)*. 2005; 67(2):301–320.

468 **Supplementary information**

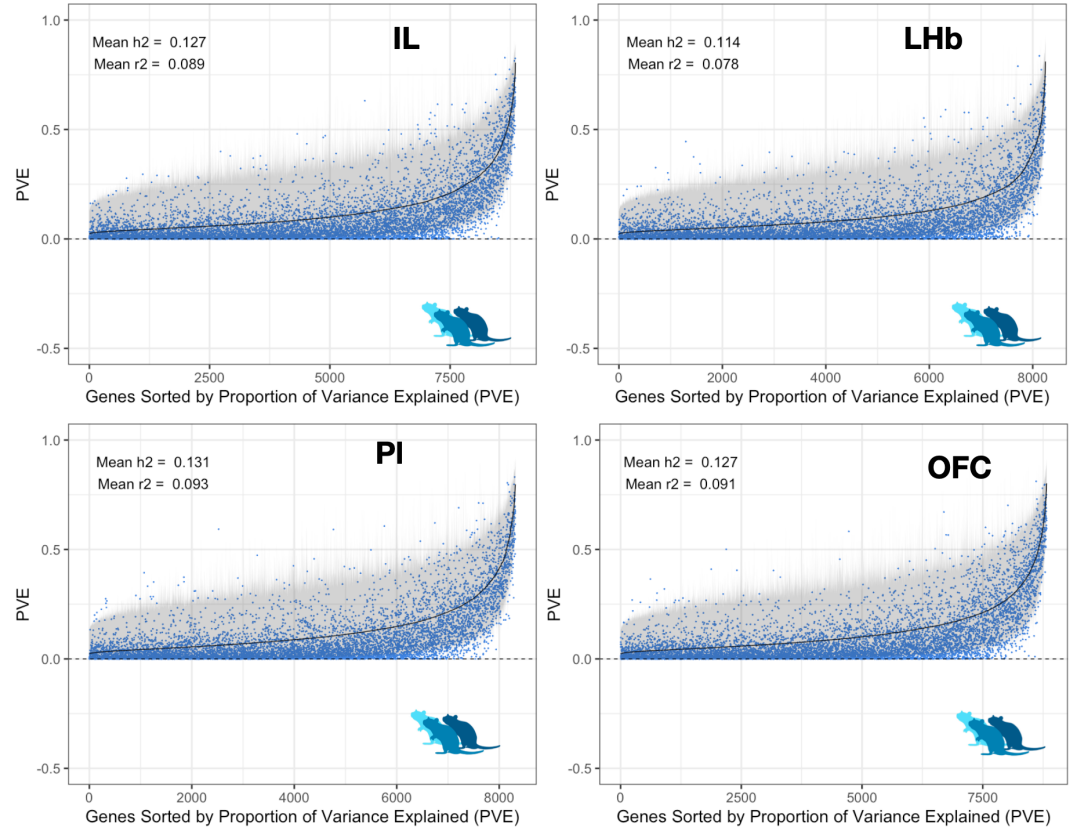

**Figure S1. Gene expression was heritable [8.86-10.12%] and comparable across several brain tissues tested (Infralimbic Cortex, IL; Lateral Habenula, LHb; Prelimbic Cortex, PL; Orbitofrontal Cortex, OFC) in rats. We refer to heritability ( $h^2$ , cis-heritability within 1Mb) as the proportion of variance explained (PVE). Across all brain tissues tested, heritability estimates were significantly correlated ( $R = [0.58 - 0.83]$ ,  $P < 2.20 \times 10^{-16}$ ).**

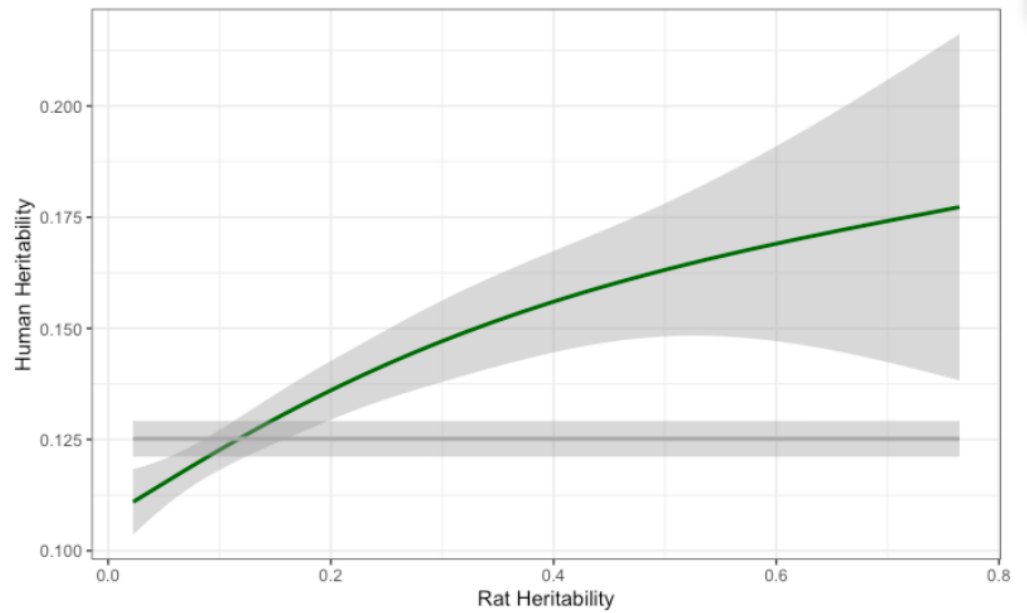

**Figure S2. Heritability of gene expression was correlated between rats and humans.** We found a significant correlation ( $R = 0.07$ ,  $P = 4.34 \times 10^{-12}$ ) between heritability estimates in rats and humans. Confidence intervals are represented as gray bars. The gray line represents the null distribution.

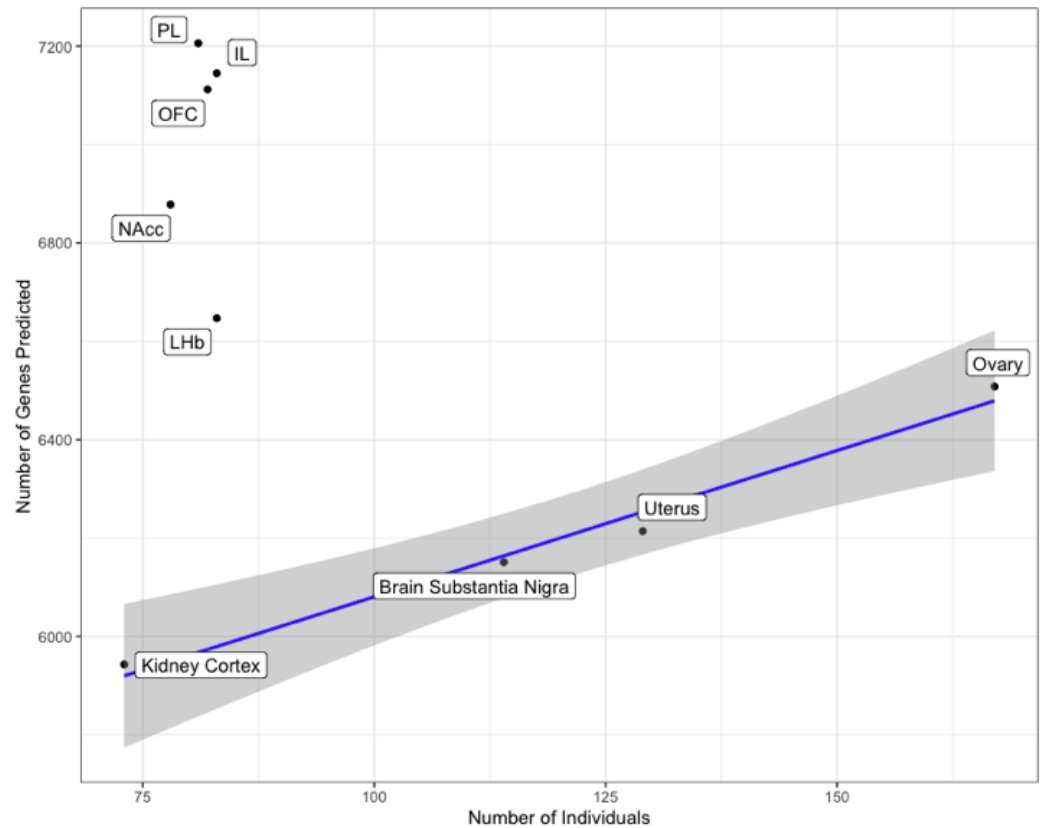

**Figure S3. Prediction was greater in rat tissues than that in human GTEx tissues.** The number of predicted genes across all five rat tissues was greater than those in GTEx human tissues with similar sample size. To ensure fair comparison, we included the same subset of genes that were orthologous across all tested tissues. Nucleus Accumbens Core (NAcc) Infralimbic Cortex (IL) Lateral Habenula (LHb) Prelimbic Cortex (PL) Orbitofrontal Cortex (OFC)

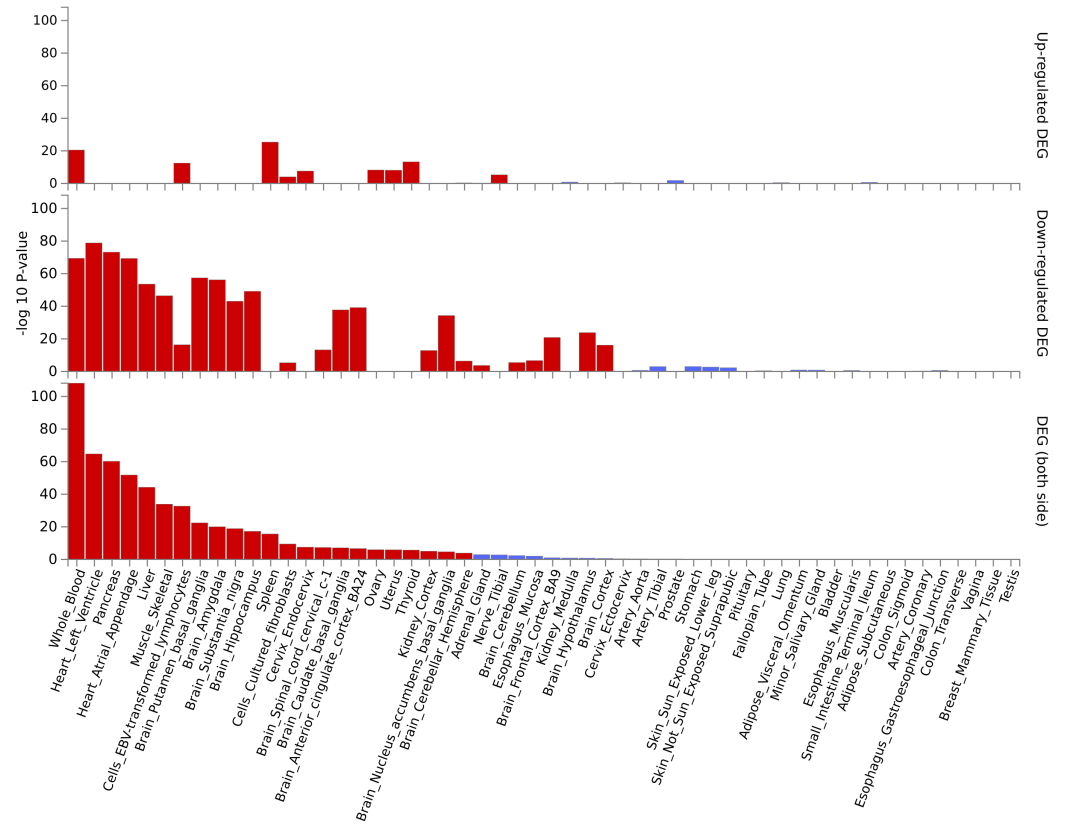

**Figure S4. Tissue analysis revealed substantial enrichment in multiple relevant tissues, including heart, pancreas, muscle, liver, and central nervous system. Significantly enriched sets ( $P < 0.05$ ) are highlighted in red.**
